# Supplementary material
Source: PubMed Central journal article supplement (PMC9884218)
Supplement: 41467_2023_36222_MOESM1_ESM.pdf [file 41467_2023_36222_MOESM1_ESM.pdf]

## **Supplementary Information**

### **Recent and rapid emergence of extensively drug-resistant *Shigella sonnei* in France**

Sophie Lefèvre, Elisabeth Njamkepo, Sarah Feldman, Corinne Ruckly, Isabelle Carle, Monique Lejay-Collin, Laëtitia Fabre, Iman Yassine, Lise Frézal, Maria Pardos de la Gandara, Arnaud Fontanet, François-Xavier Weill

**Supplementary Figure 1.** Circular map and comparative analysis of the ~ 8 kb MDR plasmids present in our XDR *S. sonnei* isolates

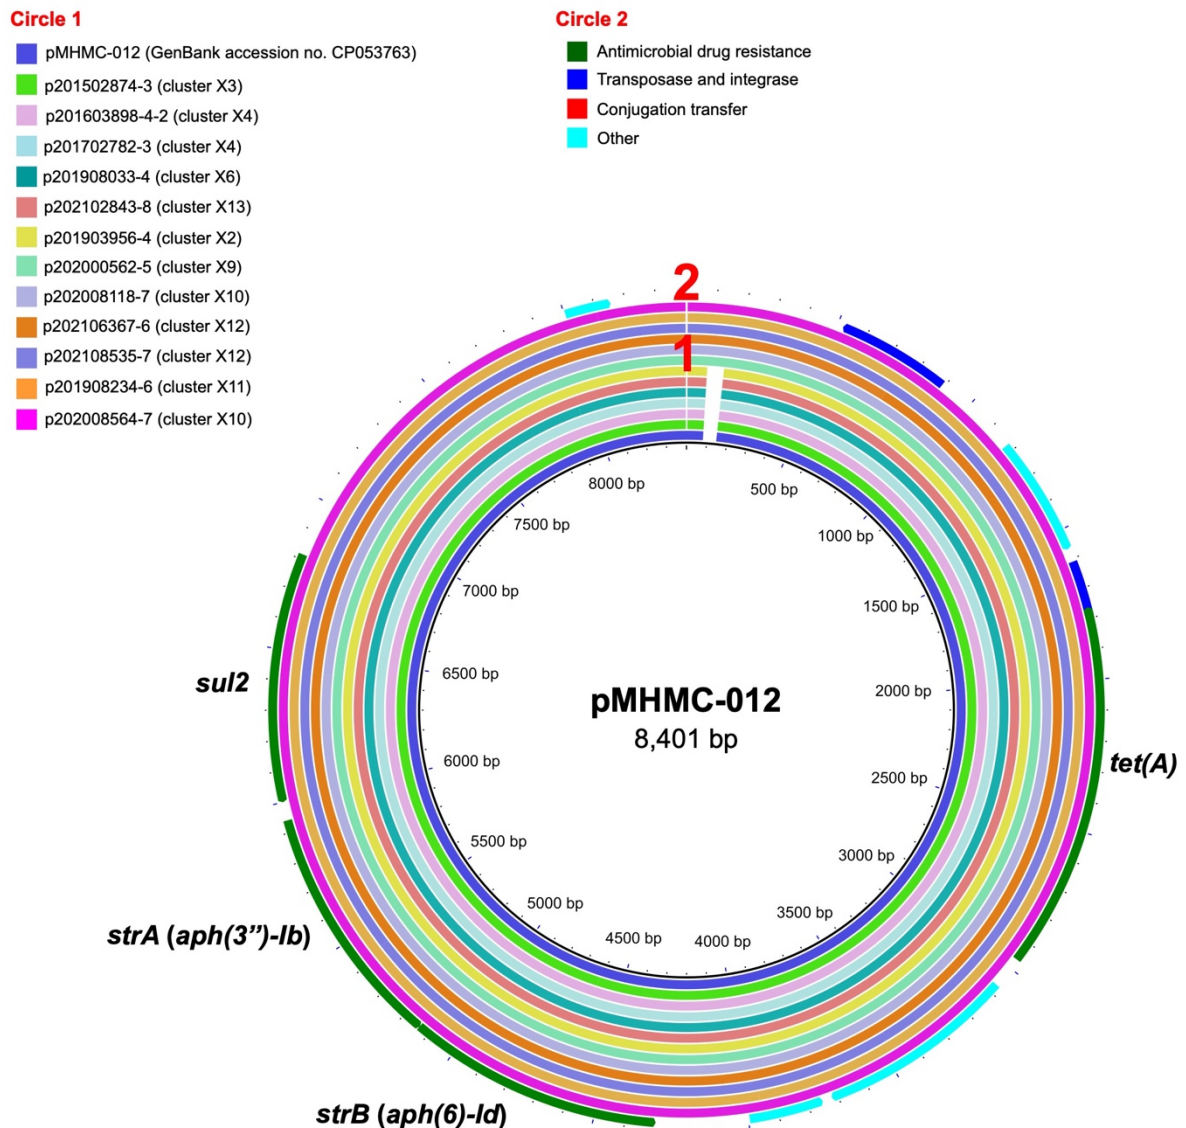

Circles from inside to outside indicate (1) the nucleotide position of pMHMC-012, a plasmid from a *S. sonnei* isolate acquired in Boston, USA in 2017 (ref. <sup>1</sup>), and regions of pMHMC-012 displaying high levels of identity to the sequences of 12 plasmids from XDR *S. sonnei* isolates in our study. The names of these plasmids and the XDR genomic clusters of their host *S. sonnei* isolates are shown in the legend, and (2) coding sequences (CDS) colored according to their functions. The antimicrobial drug resistance genes are indicated.

**Supplementary Figure 2.** Circular map and comparative analysis of IncF plasmids carrying the ESBL *bla*<sub>CTX-M-27</sub> gene

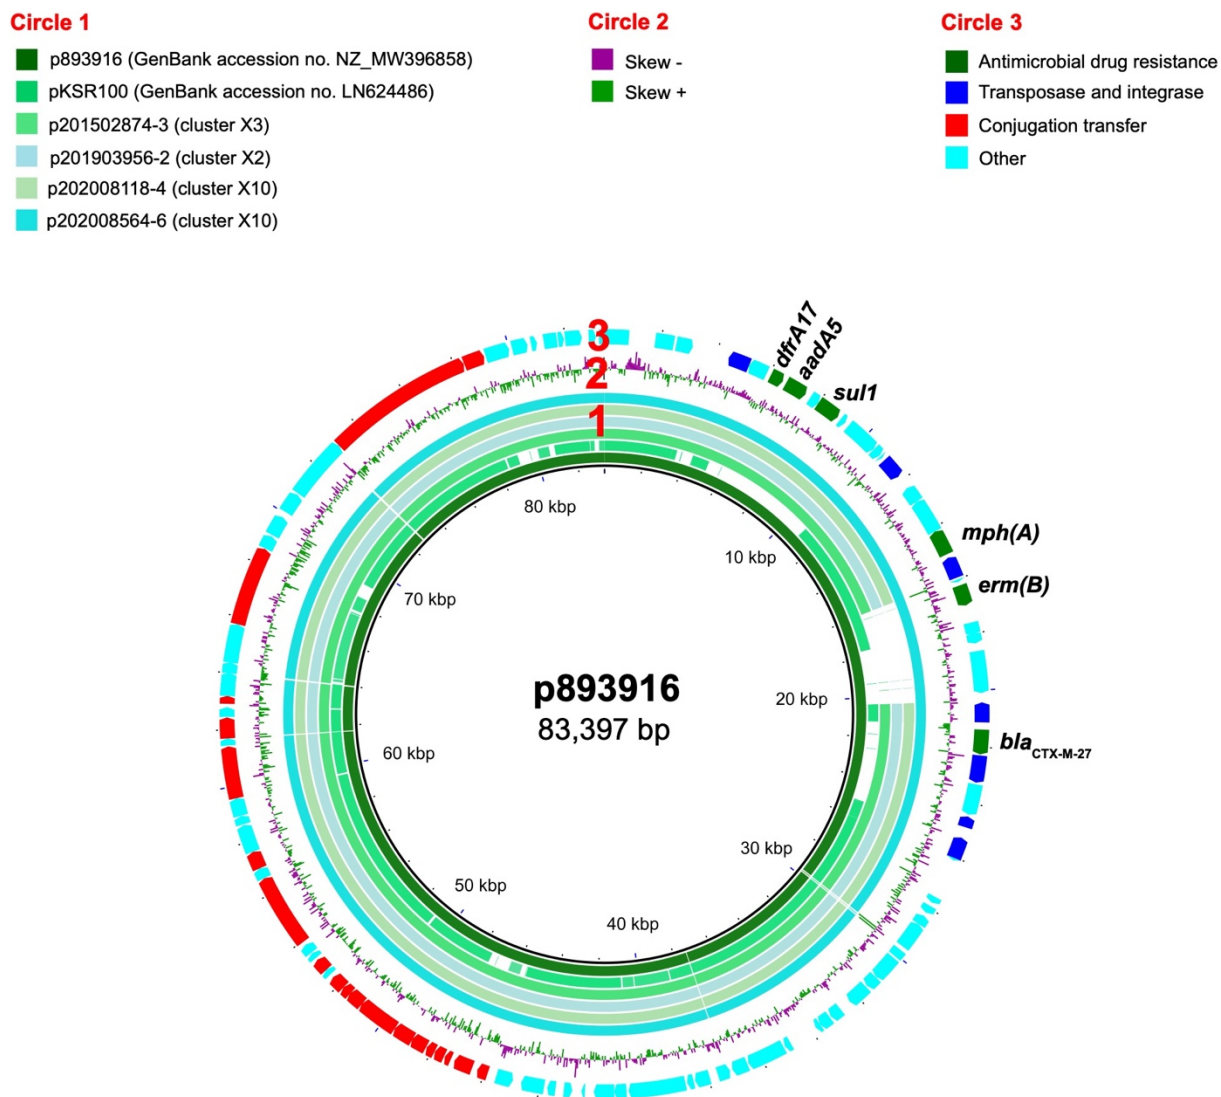

Circles from inside to outside indicate (1) the nucleotide position of p893916, a plasmid from a *S. sonnei* isolate collected in the UK in 2020 (ref. <sup>2</sup>), and regions of p893916 that displaying high levels of sequence identity to plasmids pKSR100 (from a *S. flexneri* 3a isolate, SF7955, collected in Canada in 2013)<sup>3</sup>, p201502874-3 (XDR genomic cluster X3, our study), p201903956-2 (cluster X2, our study), p202008118-4 (cluster X10, our study), and p202008564-6 (cluster X10, our study), (2) a G+C content map of p893916, and (3) coding sequences (CDS) colored according to their functions. The antimicrobial drug resistance genes are indicated.

**Supplementary Figure 3.** Circular map and comparative analysis of IncI1 plasmids carrying the ESBL *bla*<sub>CTX-M-3</sub> gene

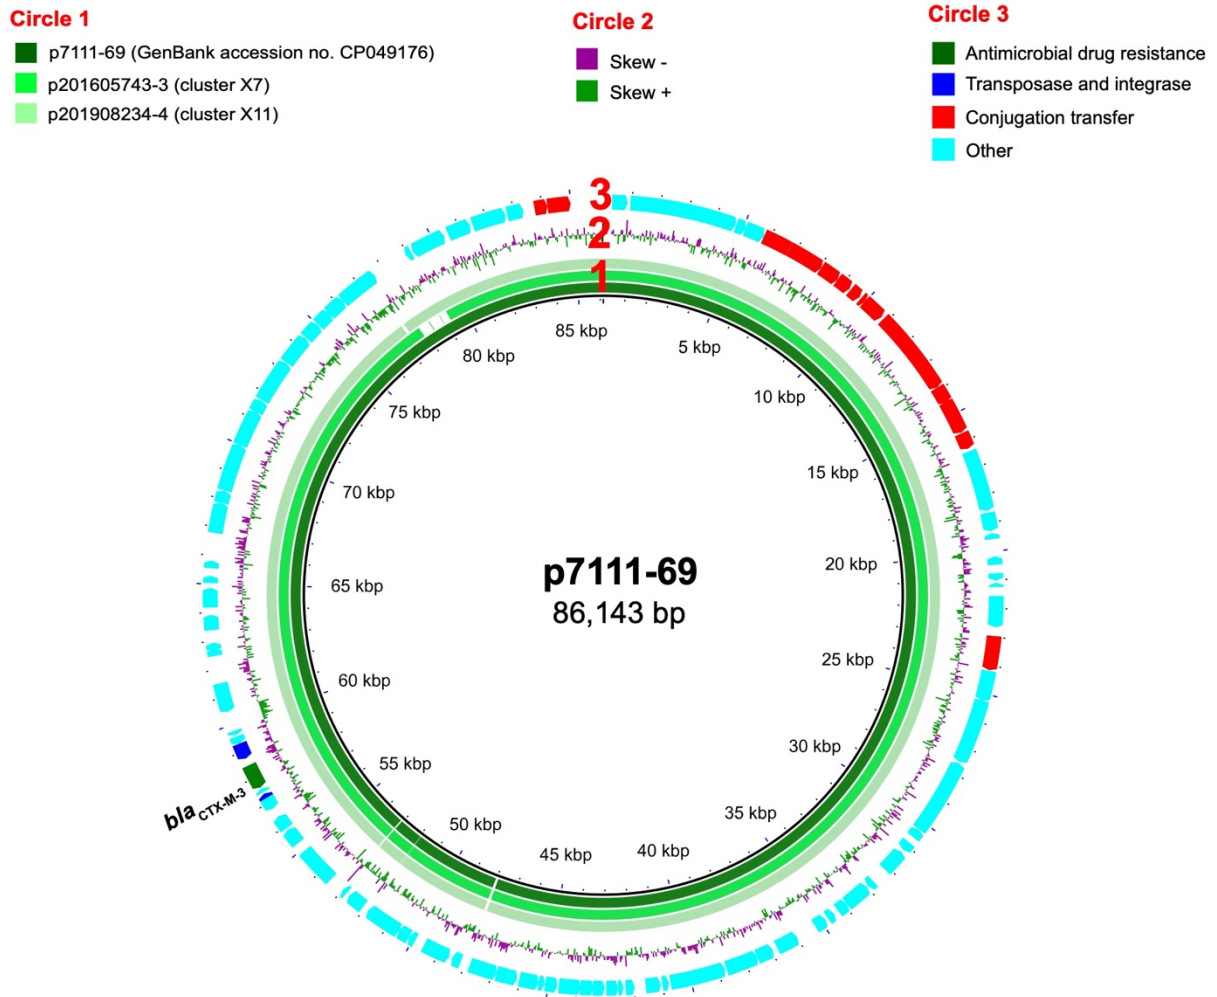

Circles from inside to outside indicate (1) the nucleotide position of p711-69, a plasmid from a *S. sonnei* isolate acquired in Turkey in 2019 (ref. <sup>4</sup>), and regions of p7111-69 displaying high levels of sequence identity to pKSR100 (from a *S. flexneri* 3a isolate, SF7955, collected in Canada in 2013)<sup>3</sup>, p201605743-3 (XDR genomic cluster X7, our study), and p201908234-4 (cluster X11, our study), (2) a G+C content map of p711-69, and (3) coding sequences (CDS) colored according to their functions. The antimicrobial drug resistance gene is indicated.

**Supplementary Figure 4.** Circular map and comparative analysis of IncF plasmids carrying the ESBL *bla*<sub>CTX-M-134</sub> gene

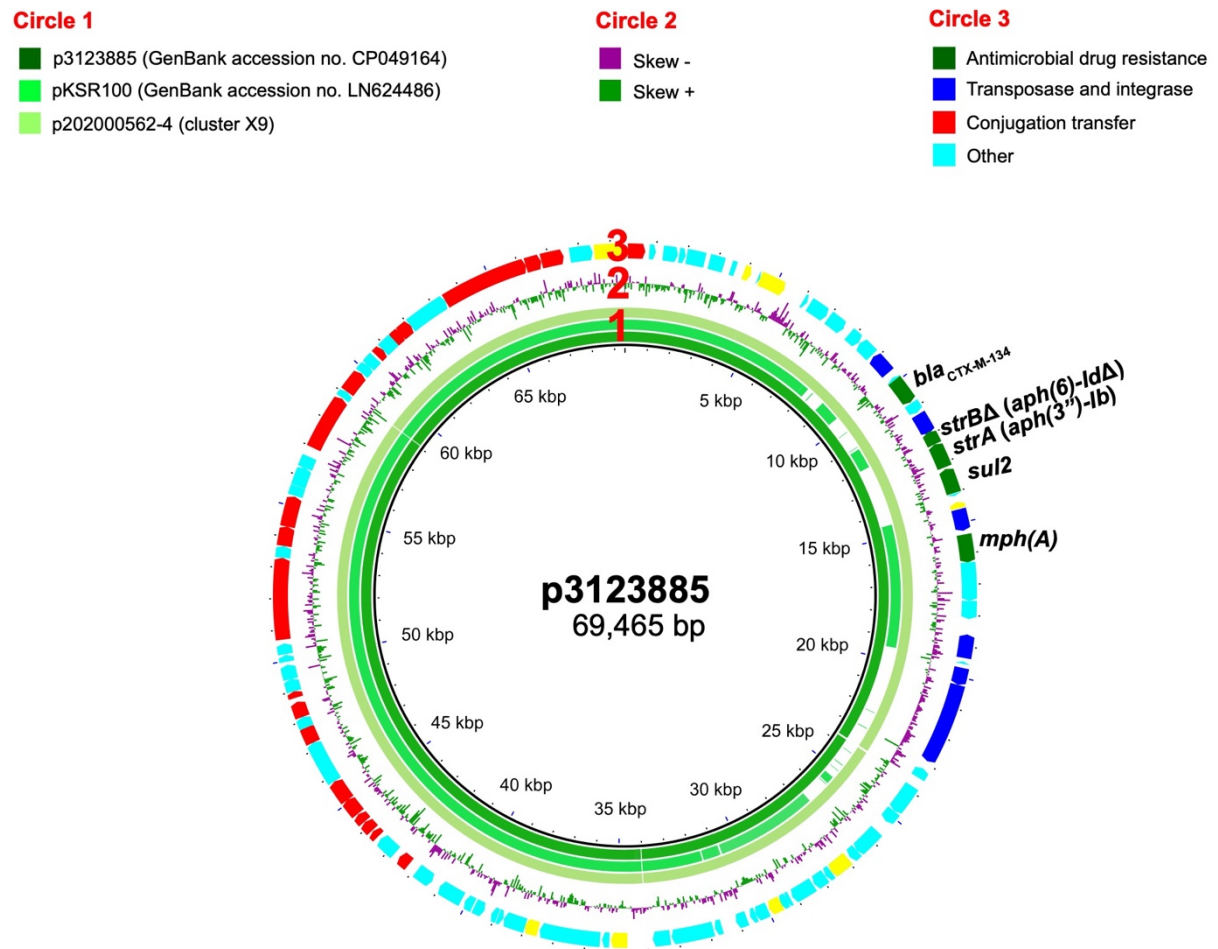

Circles from inside to outside indicate (1) the nucleotide position of p3123885, a plasmid from a *S. sonnei* isolate acquired in Israel in 2019 (ref. <sup>4</sup>), and regions of p3123885 displaying high levels of sequence identity to pKSR100 (from a *S. flexneri* 3a isolate, SF7955, collected in Canada in 2013)<sup>3</sup>, and p202000562-4 (XDR genomic cluster X9, our study), (2) a G+C content map of p3123885, and (3) coding sequences (CDS) colored according to their functions. The antimicrobial drug resistance genes are indicated (most of the *strB* gene is deleted).

**Supplementary Figure 5.** Circular map and comparative analysis of IncF plasmids carrying the ESBL *bla*<sub>CTX-M-15</sub> gene

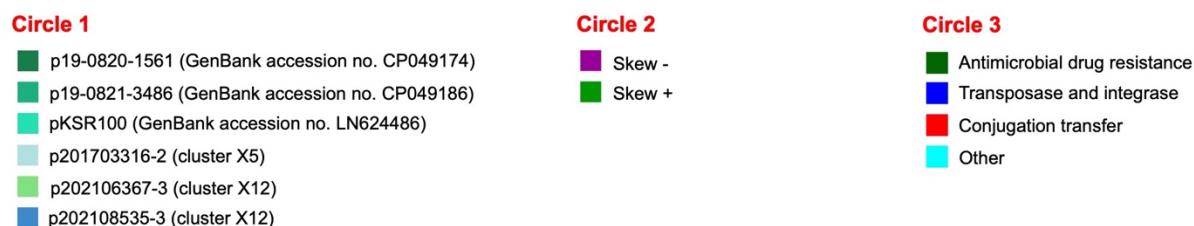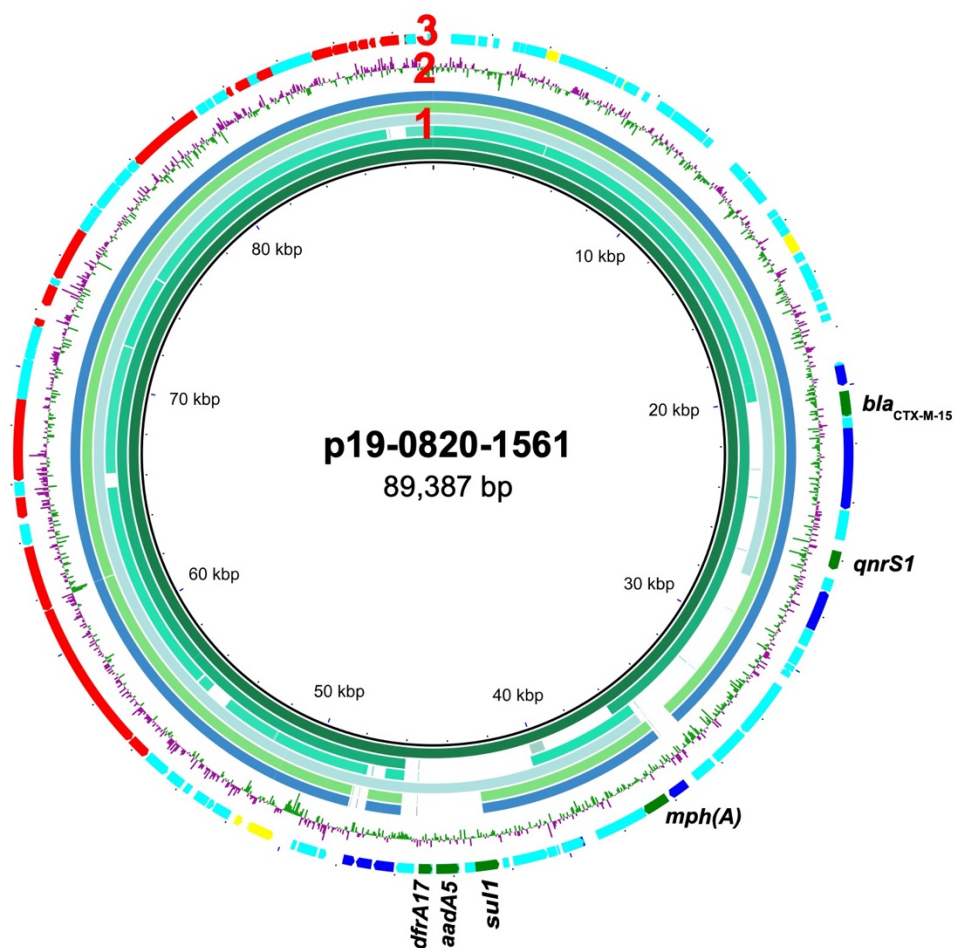

Circles from inside to outside indicate (1) the nucleotide position of p19-0820-1561, a plasmid from a *S. sonnei* isolate acquired in Nepal<sup>4</sup>, and regions of p19-0820-1561 displaying high levels of sequence identity to plasmids p19-0821-3486 (from a *S. sonnei* isolate acquired in Egypt)<sup>4</sup>, pKSR100 (from a *S. flexneri* 3a isolate, SF7955, collected in Canada, in 2013)<sup>3</sup>, p201703316-2 (XDR genomic cluster X5, our study), p202106367-3 (cluster X12, our study), and p202108535-3 (cluster X12, our study), (2) a G+C content map of p19-0820-1561, and (3) coding sequences (CDS) colored according to their functions. The antimicrobial drug resistance genes are indicated.

**Supplementary Figure 6.** Representation of the genomic island containing the *bla*<sub>CTX-M-15</sub> gene in the XDR *S. sonnei* isolate 201908033

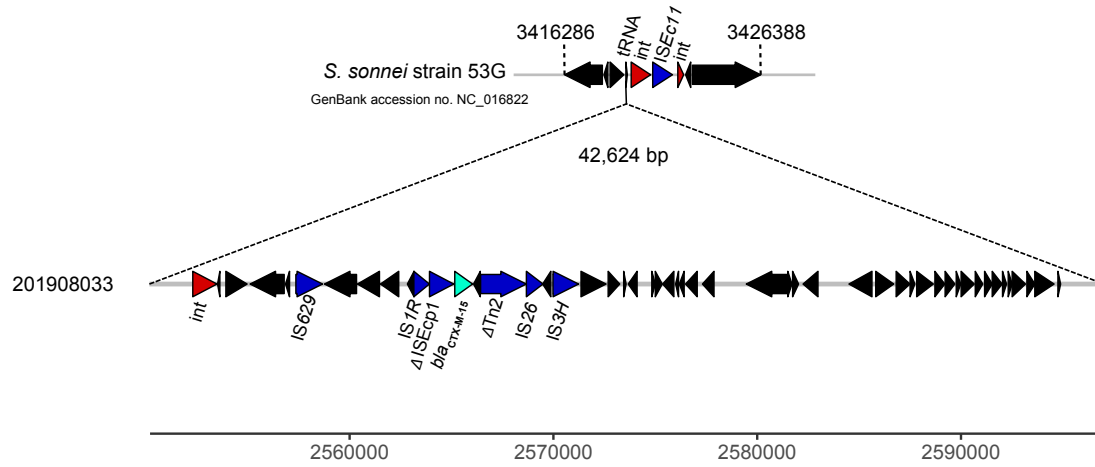

**Supplementary Figure 7.** Representation of the prophage containing the *bla*<sub>CTX-M-15</sub> gene in the XDR *S. sonnei* isolate 201701093

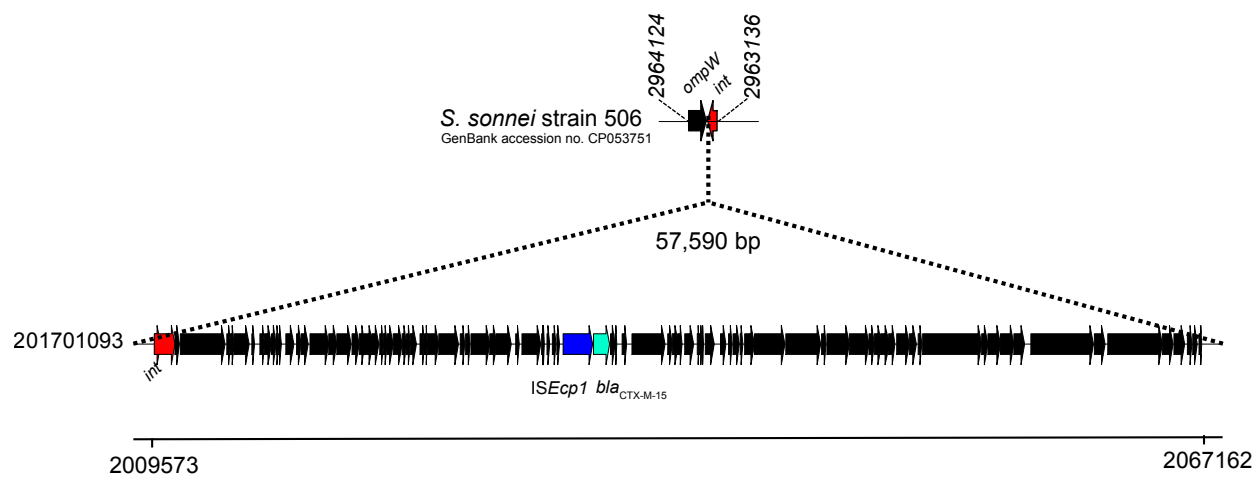



**Supplementary Figure 8.** Maximum-likelihood phylogeny of 232 *S. sonnei* genomic sequences from XDR (or inferred to be XDR) isolates.

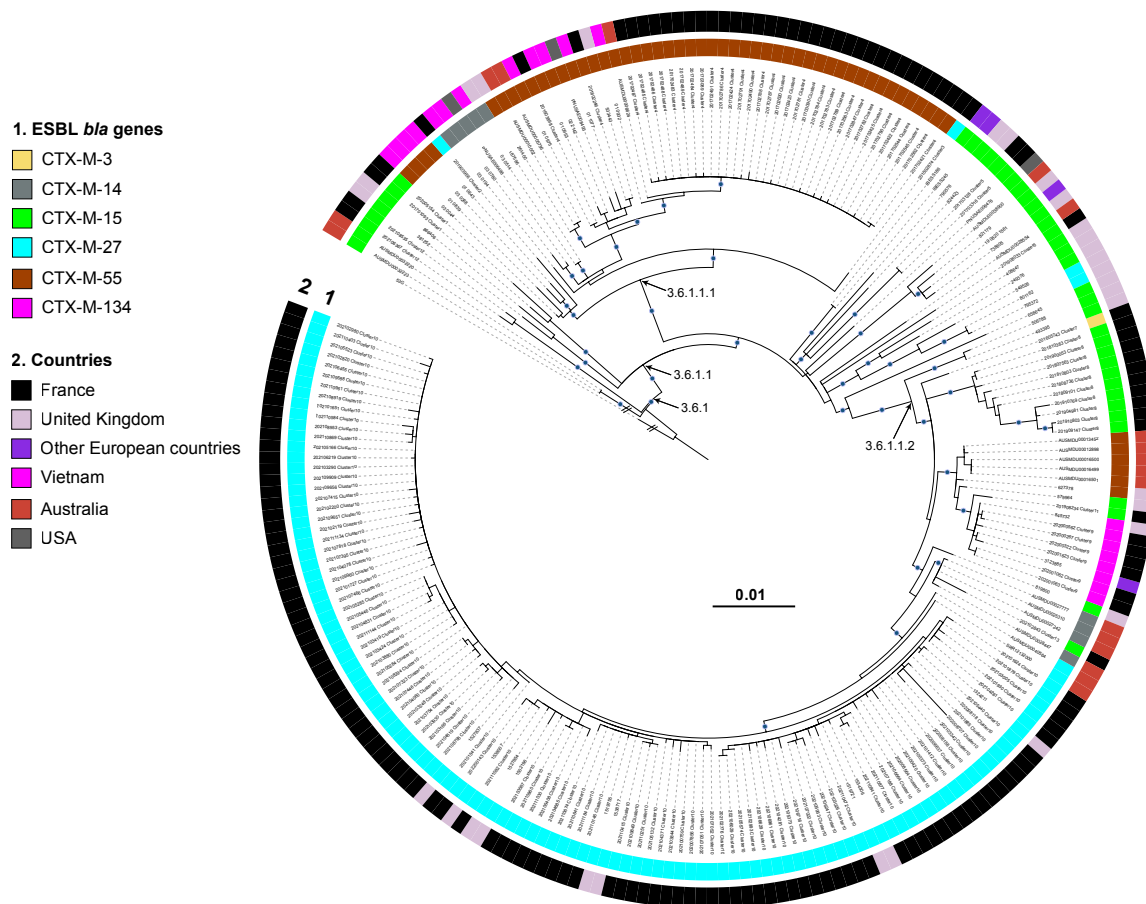

The dataset comprised the 164 French XDR, 67 international XDR (or inferred to be XDR) (Supplementary Table 4) *S. sonnei* isolates and the *S. sonnei* reference genome 53G. This reference genome (genotype 2.8.2) was used as the outgroup, and its branch length has been shortened by a factor of 100, as indicated by the double slash (//), to improve visualization. The length of the branch to genomes AUSMDU00032220 and AUSMDU00032223 (both belonging to genotype 3.6.3\_Central Asia III) has been shortened by a factor of 10, also to improve visualization. Bootstrap support of more than 95% is indicated by blue circles. The strain name (and the XDR cluster for the French XDR isolates) is indicated at the tips of the branches. The rings show the associated information (see key) for each isolate, according to its position in the phylogeny, from the innermost to the outermost in the following order: (1) presence of *bla* genes encoding extended-spectrum beta-lactamases (ESBLs); (2) Countries of isolation of the isolates. The main *S. sonnei* genotypes are indicated. The scale bar indicates the number of substitutions per variable site (SNVs).

**Supplementary Table 1.** Phenotypic characteristics and metadata for the 164 XDR *S. sonnei* studied.

| Isolate   | Year | Age group (year) | Sex | French region | Travel  | 2017 school outbreak | Phenotypic antimicrobial drug resistance profile | MIC (mg/L) |      |      |
|-----------|------|------------------|-----|---------------|---------|----------------------|--------------------------------------------------|------------|------|------|
|           |      |                  |     |               |         |                      |                                                  | CIP        | AZM  | CRO  |
| 201502874 | 2015 | >15              | M   | Metropole     | Unknown | No                   | AMP CRO STR SMX TMP SXT TET NAL CIP AZM          | 4          | 96   | 24   |
| 201603898 | 2016 | >15              | M   | Metropole     | Vietnam | No                   | AMP CRO STR GEN SMX TMP SXT TET NAL CIP AZM      | 2          | 48   | 32   |
| 201605743 | 2016 | >15              | M   | Metropole     | Unknown | No                   | AMP CRO STR SMX TMP SXT NAL CIP AZM              | 3          | ≥256 | 64   |
| 201701093 | 2017 | >15              | F   | Metropole     | None    | No                   | AMP CRO SMX TMP SXT NAL CIP AZM                  | 8          | ≥256 | 128  |
| 201702421 | 2017 | 0-15             | F   | Metropole     | None    | Yes                  | AMP CRO STR GEN SMX TMP SXT TET NAL CIP AZM      | 3          | 64   | 96   |
| 201702422 | 2017 | 0-15             | F   | Metropole     | None    | Yes                  | AMP CRO STR GEN SMX TMP SXT TET NAL CIP AZM      | 4          | 64   | 64   |
| 201702423 | 2017 | 0-15             | M   | Metropole     | None    | Yes                  | AMP CRO STR GEN SMX TMP SXT TET NAL CIP AZM      | 4          | 48   | 192  |
| 201702424 | 2017 | 0-15             | F   | Metropole     | None    | Yes                  | AMP CRO STR GEN SMX TMP SXT TET NAL CIP AZM      | 4          | 128  | 96   |
| 201702425 | 2017 | 0-15             | M   | Metropole     | None    | Yes                  | AMP CRO STR GEN SMX TMP SXT TET NAL CIP AZM      | 4          | 64   | ≥256 |
| 201702483 | 2017 | 0-15             | F   | Metropole     | None    | Yes                  | AMP CRO STR GEN SMX TMP SXT TET NAL CIP AZM      | 3          | 64   | 64   |
| 201702484 | 2017 | 0-15             | M   | Metropole     | None    | Yes                  | AMP CRO STR GEN SMX TMP SXT TET NAL CIP AZM      | 3          | 64   | 64   |
| 201702485 | 2017 | 0-15             | M   | Metropole     | None    | Yes                  | AMP CRO STR GEN SMX TMP SXT TET NAL CIP AZM      | 3          | 96   | 192  |
| 201702486 | 2017 | 0-15             | M   | Metropole     | None    | Yes                  | AMP CRO STR GEN SMX TMP SXT TET NAL CIP AZM      | 3          | 64   | 96   |
| 201702487 | 2017 | 0-15             | M   | Metropole     | None    | Yes                  | AMP CRO STR GEN SMX TMP SXT TET NAL CIP AZM      | 2          | 64   | 64   |
| 201702488 | 2017 | 0-15             | F   | Metropole     | None    | Yes                  | AMP CRO STR GEN SMX TMP SXT TET NAL CIP AZM      | 3          | 64   | 64   |
| 201702489 | 2017 | 0-15             | M   | Metropole     | None    | Yes                  | AMP CRO STR GEN SMX TMP SXT TET NAL CIP AZM      | 3          | 64   | 96   |
| 201702490 | 2017 | 0-15             | F   | Metropole     | None    | Yes                  | AMP CRO STR GEN SMX TMP SXT TET NAL CIP AZM      | 2          | 64   | 48   |
| 201702491 | 2017 | 0-15             | M   | Metropole     | None    | Yes                  | AMP CRO STR GEN SMX TMP SXT TET NAL CIP AZM      | 3          | 64   | 96   |
| 201702544 | 2017 | 0-15             | F   | Metropole     | None    | Yes                  | AMP CRO STR GEN SMX TMP SXT TET NAL CIP AZM      | 3          | 96   | ≥256 |
| 201702545 | 2017 | 0-15             | M   | Metropole     | None    | Yes                  | AMP CRO STR GEN SMX TMP SXT TET NAL CIP AZM      | 2          | 64   | 96   |
| 201702562 | 2017 | 0-15             | M   | Metropole     | None    | Yes                  | AMP CRO STR GEN SMX TMP SXT TET NAL CIP AZM      | 3          | 64   | 64   |
| 201702563 | 2017 | 0-15             | F   | Metropole     | None    | Yes                  | AMP CRO STR GEN SMX TMP SXT TET NAL CIP AZM      | 3          | 96   | 32   |
| 201702620 | 2017 | >15              | M   | Metropole     | None    | Yes                  | AMP CRO STR GEN SMX TMP SXT TET NAL CIP AZM      | 3          | 128  | ≥256 |
| 201702781 | 2017 | 0-15             | M   | Metropole     | Vietnam | Yes                  | AMP CRO STR GEN SMX TMP SXT TET NAL CIP AZM      | 3          | 96   | ≥256 |
| 201702782 | 2017 | 0-15             | F   | Metropole     | None    | Yes                  | AMP CRO STR GEN SMX TMP SXT TET NAL CIP AZM      | 4          | 128  | 64   |
| 201702783 | 2017 | 0-15             | M   | Metropole     | None    | Yes                  | AMP CRO STR GEN SMX TMP SXT TET NAL CIP AZM      | 3          | 96   | 96   |
| 201702784 | 2017 | 0-15             | M   | Metropole     | None    | Yes                  | AMP CRO STR GEN SMX TMP SXT TET NAL CIP AZM      | 3          | 96   | 64   |
| 201702786 | 2017 | 0-15             | M   | Metropole     | None    | Yes                  | AMP CRO STR GEN SMX TMP SXT TET NAL CIP AZM      | 3          | 96   | 192  |
| 201702787 | 2017 | >15              | M   | Metropole     | None    | Yes                  | AMP CRO STR GEN SMX TMP SXT TET NAL CIP AZM      | 3          | 96   | 128  |
| 201702788 | 2017 | >15              | F   | Metropole     | None    | Yes                  | AMP CRO STR GEN SMX TMP SXT TET NAL CIP AZM      | 3          | 48   | 128  |
| 201702789 | 2017 | 0-15             | F   | Metropole     | None    | Yes                  | AMP CRO STR GEN SMX TMP SXT TET NAL CIP AZM      | 3          | 128  | 96   |
| 201702790 | 2017 | 0-15             | M   | Metropole     | None    | Yes                  | AMP CRO STR GEN SMX TMP SXT TET NAL CIP AZM      | 3          | 96   | 96   |
| 201702791 | 2017 | 0-15             | M   | Metropole     | None    | Yes                  | AMP CRO STR GEN SMX TMP SXT TET NAL CIP AZM      | 3          | 128  | 64   |
| 201702847 | 2017 | >15              | F   | Metropole     | None    | Yes                  | AMP CRO STR GEN SMX TMP SXT TET NAL CIP AZM      | 3          | 96   | 96   |
| 201703089 | 2017 | >15              | F   | Metropole     | None    | Yes                  | AMP CRO STR GEN SMX TMP SXT TET NAL CIP AZM      | >32        | 96   | 48   |
| 201703090 | 2017 | 0-15             | M   | Metropole     | None    | Yes                  | AMP CRO STR GEN SMX TMP SXT TET NAL CIP AZM      | 4          | 128  | ≥256 |
| 201703128 | 2017 | 0-15             | F   | Metropole     | India   | No                   | AMP CRO STR SMX TMP SXT NAL CIP AZM              | 6          | 128  | 12   |
| 201703316 | 2017 | >15              | F   | Metropole     | India   | No                   | AMP CRO STR SMX TMP SXT NAL CIP AZM              | 6          | 192  | 16   |
| 201802246 | 2018 | 0-15             | F   | Metropole     | Vietnam | No                   | AMP CRO STR SMX TMP SXT TET NAL CIP AZM          | 4          | 128  | 128  |
| 201807563 | 2018 | >15              | M   | Metropole     | None    | No                   | AMP CRO STR SMX TMP SXT TET NAL CIP AZM          | >32        | ≥256 | 128  |
| 201808736 | 2018 | >15              | M   | Metropole     | Unknown | No                   | AMP CRO STR SMX TMP SXT TET NAL CIP AZM          | 24         | ≥256 | 24   |
| 201809101 | 2018 | >15              | M   | Metropole     | None    | No                   | AMP CRO STR SMX TMP SXT TET NAL CIP AZM          | 24         | ≥256 | 24   |

|           |      |      |   |            |             |    |                                         |     |      |      |
|-----------|------|------|---|------------|-------------|----|-----------------------------------------|-----|------|------|
| 201810383 | 2018 | >15  | M | Metropole  | None        | No | AMP CRO STR SMX TMP SXT TET NAL CIP AZM | >32 | ≥256 | 12   |
| 201810803 | 2018 | >15  | M | Metropole  | Spain       | No | AMP CRO STR SMX TMP SXT TET NAL CIP AZM | 24  | ≥256 | 32   |
| 201900053 | 2019 | >15  | M | Metropole  | Unknown     | No | AMP CRO STR SMX TMP SXT TET NAL CIP AZM | 24  | ≥256 | 32   |
| 201903956 | 2019 | >15  | F | Metropole  | Cambodia    | No | AMP CRO STR SMX TMP SXT TET NAL CIP AZM | 6   | 192  | 64   |
| 201904981 | 2019 | >15  | M | Metropole  | None        | No | AMP CRO STR SMX TMP SXT TET NAL CIP AZM | >32 | ≥256 | 24   |
| 201908033 | 2019 | 0-15 | M | Metropole  | None        | No | AMP CRO STR SMX TMP SXT TET NAL CIP AZM | 4   | ≥256 | ≥256 |
| 201908234 | 2019 | >15  | M | Metropole  | None        | No | AMP CRO STR SMX TMP SXT TET NAL CIP AZM | 4   | ≥256 | 32   |
| 201909147 | 2019 | >15  | M | Metropole  | None        | No | AMP CRO STR SMX TMP SXT TET NAL CIP AZM | 24  | ≥256 | 24   |
| 201910769 | 2019 | >15  | M | Metropole  | Spain       | No | AMP CRO STR SMX TMP SXT TET NAL CIP AZM | >32 | ≥256 | 128  |
| 201910803 | 2019 | >15  | M | Metropole  | None        | No | AMP CRO STR SMX TMP SXT TET NAL CIP AZM | >32 | ≥256 | 48   |
| 202000267 | 2020 | >15  | M | Metropole  | None        | No | AMP CRO STR SMX TMP SXT TET NAL CIP AZM | 4   | 192  | 24   |
| 202000322 | 2020 | >15  | M | Metropole  | Unknown     | No | AMP CRO STR SMX TMP SXT TET NAL CIP AZM | 4   | 192  | 48   |
| 202000562 | 2020 | >15  | M | Metropole  | None        | No | AMP CRO STR SMX TMP SXT TET NAL CIP AZM | 3   | 192  | 48   |
| 202001062 | 2020 | >15  | M | Metropole  | Switzerland | No | AMP CRO STR SMX TMP SXT TET NAL CIP AZM | 4   | 192  | 96   |
| 202001063 | 2020 | >15  | F | Metropole  | Spain       | No | AMP CRO STR SMX TMP SXT TET NAL CIP AZM | 4   | 192  | 96   |
| 202001623 | 2020 | >15  | M | Metropole  | None        | No | AMP CRO STR SMX TMP SXT TET NAL CIP AZM | 4   | 192  | 128  |
| 202005154 | 2020 | >15  | F | La Réunion | None        | No | AMP CRO SMX TMP SXT NAL CIP AZM         | 6   | ≥256 | 16   |
| 202006637 | 2020 | >15  | M | Metropole  | None        | No | AMP CRO STR SMX TMP SXT TET NAL CIP AZM | 12  | ≥256 | 18   |
| 202007856 | 2020 | >15  | M | Metropole  | None        | No | AMP CRO STR SMX TMP SXT TET NAL CIP AZM | 12  | ≥256 | 48   |
| 202008118 | 2020 | >15  | M | Metropole  | None        | No | AMP CRO STR SMX TMP SXT TET NAL CIP AZM | 8   | 192  | 32   |
| 202008158 | 2020 | >15  | M | Metropole  | None        | No | AMP CRO STR SMX TMP SXT TET NAL CIP AZM | 12  | ≥256 | 16   |
| 202008564 | 2020 | >15  | M | Metropole  | None        | No | AMP CRO STR SMX TMP SXT TET NAL CIP AZM | 12  | ≥256 | 32   |
| 202008707 | 2020 | >15  | M | Metropole  | None        | No | AMP CRO STR SMX TMP SXT TET NAL CIP AZM | 8   | 128  | 16   |
| 202100373 | 2021 | >15  | M | Metropole  | Unknown     | No | AMP CRO STR SMX TMP SXT TET NAL CIP AZM | 8   | 192  | 24   |
| 202100420 | 2021 | >15  | M | Metropole  | Unknown     | No | AMP CRO STR SMX TMP SXT TET NAL CIP AZM | 8   | 192  | 128  |
| 202100759 | 2021 | >15  | M | Metropole  | Unknown     | No | AMP CRO STR SMX TMP SXT TET NAL CIP AZM | 12  | ≥256 | 16   |
| 202101412 | 2021 | >15  | M | Metropole  | Unknown     | No | AMP CRO STR SMX TMP SXT TET NAL CIP AZM | 12  | ≥256 | 32   |
| 202101541 | 2021 | >15  | M | Metropole  | None        | No | AMP CRO STR SMX TMP SXT NAL CIP AZM     | 8   | ≥256 | 48   |
| 202101624 | 2021 | >15  | M | Metropole  | Unknown     | No | AMP CRO STR SMX TMP SXT TET NAL CIP AZM | 12  | ≥256 | 96   |
| 202101651 | 2021 | >15  | M | Metropole  | None        | No | AMP CRO STR SMX TMP SXT TET NAL CIP AZM | 32  | ≥256 | 64   |
| 202101727 | 2021 | >15  | M | Metropole  | None        | No | AMP CRO STR SMX TMP SXT TET NAL CIP AZM | 12  | ≥256 | 24   |
| 202101879 | 2021 | >15  | M | Metropole  | None        | No | AMP CRO STR SMX TMP SXT TET NAL CIP AZM | 6   | ≥256 | 32   |
| 202101885 | 2021 | >15  | M | Metropole  | Unknown     | No | AMP CRO STR SMX TMP SXT TET NAL CIP AZM | 8   | 192  | 32   |
| 202101930 | 2021 | >15  | M | Metropole  | Unknown     | No | AMP CRO STR SMX TMP SXT TET NAL CIP AZM | 12  | ≥256 | 24   |
| 202102119 | 2021 | >15  | M | Metropole  | Unknown     | No | AMP CRO STR SMX TMP SXT TET NAL CIP AZM | 8   | ≥256 | 48   |
| 202102200 | 2021 | >15  | M | Metropole  | Unknown     | No | AMP CRO STR SMX TMP SXT TET NAL CIP AZM | 8   | ≥256 | 32   |
| 202102776 | 2021 | >15  | M | Metropole  | None        | No | AMP CRO STR SMX TMP SXT TET NAL CIP AZM | 8   | ≥256 | 48   |
| 202102820 | 2021 | >15  | M | Metropole  | None        | No | AMP CRO STR SMX TMP SXT TET NAL CIP AZM | 8   | ≥256 | 24   |
| 202102843 | 2021 | >15  | M | Metropole  | None        | No | AMP CRO STR SMX TMP SXT TET NAL CIP AZM | 6   | ≥256 | 12   |
| 202102980 | 2021 | >15  | M | Metropole  | None        | No | AMP CRO STR SMX TMP SXT TET NAL CIP AZM | 6   | 128  | 24   |
| 202102993 | 2021 | >15  | M | Metropole  | Unknown     | No | AMP CRO STR SMX TMP SXT TET NAL CIP AZM | 8   | ≥256 | 64   |
| 202103005 | 2021 | >15  | M | Metropole  | None        | No | AMP CRO STR SMX TMP SXT TET NAL CIP AZM | 6   | 96   | 24   |
| 202103026 | 2021 | >15  | M | Metropole  | None        | No | AMP CRO STR SMX TMP SXT TET NAL CIP AZM | 8   | ≥256 | 32   |
| 202103166 | 2021 | >15  | M | Metropole  | None        | No | AMP CRO STR SMX TMP SXT TET NAL CIP AZM | 6   | ≥256 | 24   |
| 202103248 | 2021 | >15  | M | Metropole  | None        | No | AMP CRO STR SMX TMP SXT TET NAL CIP AZM | 6   | ≥256 | 24   |
| 202103290 | 2021 | >15  | M | Metropole  | None        | No | AMP CRO STR SMX TMP SXT TET NAL CIP AZM | 6   | 32   | 24   |
| 202103342 | 2021 | >15  | M | Metropole  | None        | No | AMP CRO STR SMX TMP SXT TET NAL CIP AZM | 6   | 96   | 24   |
| 202103419 | 2021 | >15  | M | Metropole  | None        | No | AMP CRO STR SMX TMP SXT TET NAL CIP AZM | 6   | 96   | 24   |
| 202103424 | 2021 | >15  | M | Metropole  | Cameroon    | No | AMP CRO STR SMX TMP SXT TET NAL CIP AZM | 6   | 32   | 48   |
| 202103567 | 2021 | >15  | M | Metropole  | Unknown     | No | AMP CRO STR SMX TMP SXT TET NAL CIP AZM | 8   | ≥256 | 24   |
| 202103754 | 2021 | >15  | M | Metropole  | Unknown     | No | AMP CRO STR SMX TMP SXT TET NAL CIP AZM | 6   | ≥256 | 32   |

|           |      |      |   |           |         |    |                                         |    |      |     |
|-----------|------|------|---|-----------|---------|----|-----------------------------------------|----|------|-----|
| 202103844 | 2021 | >15  | M | Metropole | Unknown | No | AMP CRO STR SMX TMP SXT TET NAL CIP AZM | 6  | ≥256 | 48  |
| 202103880 | 2021 | >15  | M | Metropole | None    | No | AMP CRO STR SMX TMP SXT TET NAL CIP AZM | 8  | 48   | 32  |
| 202103930 | 2021 | >15  | M | Metropole | None    | No | AMP CRO STR SMX TMP SXT TET NAL CIP AZM | 6  | ≥256 | 32  |
| 202104060 | 2021 | >15  | F | Metropole | Unknown | No | AMP CRO STR SMX TMP SXT TET NAL CIP AZM | 4  | ≥256 | 32  |
| 202104078 | 2021 | >15  | M | Metropole | None    | No | AMP CRO STR SMX TMP SXT TET NAL CIP AZM | 8  | 128  | 48  |
| 202104261 | 2021 | >15  | M | Metropole | None    | No | AMP CRO STR SMX TMP SXT TET NAL CIP AZM | 6  | ≥256 | 16  |
| 202104281 | 2021 | >15  | M | Metropole | None    | No | AMP CRO STR SMX TMP SXT TET NAL CIP AZM | 24 | ≥256 | 96  |
| 202104371 | 2021 | >15  | M | Metropole | Unknown | No | AMP CRO STR SMX TMP SXT TET NAL CIP AZM | 6  | ≥256 | 24  |
| 202104519 | 2021 | >15  | M | Metropole | None    | No | AMP CRO STR SMX TMP SXT TET NAL CIP AZM | 6  | ≥256 | 16  |
| 202104685 | 2021 | >15  | M | Metropole | Unknown | No | AMP CRO STR SMX TMP SXT TET NAL CIP AZM | 6  | ≥256 | 16  |
| 202104831 | 2021 | >15  | M | Metropole | None    | No | AMP CRO STR SMX TMP SXT TET NAL CIP AZM | 8  | ≥256 | 48  |
| 202105132 | 2021 | >15  | M | Metropole | Unknown | No | AMP CRO STR SMX TMP SXT TET NAL CIP AZM | 8  | 192  | 32  |
| 202105166 | 2021 | >15  | M | Metropole | Unknown | No | AMP CRO STR SMX TMP SXT TET NAL CIP AZM | 6  | ≥256 | 32  |
| 202105284 | 2021 | >15  | M | Metropole | None    | No | AMP CRO STR SMX TMP SXT TET NAL CIP AZM | 8  | ≥256 | 192 |
| 202105285 | 2021 | >15  | M | Metropole | None    | No | AMP CRO STR SMX TMP SXT TET NAL CIP AZM | 12 | 96   | 48  |
| 202105373 | 2021 | >15  | M | Metropole | Unknown | No | AMP CRO STR SMX TMP SXT TET NAL CIP AZM | 16 | ≥256 | 24  |
| 202105408 | 2021 | >15  | M | Metropole | Unknown | No | AMP CRO STR SMX TMP SXT TET NAL CIP AZM | 12 | ≥256 | 24  |
| 202105440 | 2021 | >15  | M | Metropole | Unknown | No | AMP CRO STR SMX TMP SXT TET NAL CIP AZM | 8  | ≥256 | 192 |
| 202105446 | 2021 | >15  | M | Metropole | Unknown | No | AMP CRO TMP NAL CIP AZM                 | 12 | 48   | 48  |
| 202105523 | 2021 | >15  | M | Metropole | None    | No | AMP CRO STR SMX TMP SXT TET NAL CIP AZM | 4  | ≥256 | 64  |
| 202105574 | 2021 | >15  | M | Metropole | None    | No | AMP CRO STR SMX TMP SXT TET NAL CIP AZM | 12 | ≥256 | 64  |
| 202105953 | 2021 | >15  | F | Metropole | Unknown | No | AMP CRO STR SMX TMP SXT TET NAL CIP AZM | 12 | ≥256 | 32  |
| 202106029 | 2021 | >15  | M | Metropole | Unknown | No | AMP CRO STR SMX TMP SXT TET NAL CIP AZM | 8  | ≥256 | 32  |
| 202106219 | 2021 | >15  | M | Metropole | None    | No | AMP CRO STR SMX TMP SXT TET NAL CIP AZM | 8  | ≥256 | 24  |
| 202106247 | 2021 | 0-15 | M | Metropole | Unknown | No | AMP CRO STR SMX TMP SXT TET NAL CIP AZM | 12 | ≥256 | 16  |
| 202106367 | 2021 | >15  | F | Metropole | Lebanon | No | AMP CRO STR SMX TMP SXT TET NAL CIP AZM | 1  | 96   | 6   |
| 202106455 | 2021 | >15  | M | Metropole | None    | No | AMP CRO STR SMX TMP SXT TET NAL CIP AZM | 4  | ≥256 | 24  |
| 202106629 | 2021 | >15  | M | Metropole | Unknown | No | AMP CRO STR SMX TMP SXT TET NAL CIP AZM | 32 | ≥256 | 24  |
| 202106664 | 2021 | >15  | M | Metropole | None    | No | AMP CRO STR SMX TMP SXT NAL CIP AZM     | 16 | ≥256 | 24  |
| 202106716 | 2021 | >15  | M | Metropole | Spain   | No | AMP CRO STR SMX TMP SXT TET NAL CIP AZM | 12 | ≥256 | 24  |
| 202106961 | 2021 | >15  | M | Metropole | Unknown | No | AMP CRO STR SMX TMP SXT TET NAL CIP AZM | 32 | ≥256 | 12  |
| 202107022 | 2021 | >15  | M | Metropole | None    | No | AMP CRO STR SMX TMP SXT TET NAL CIP AZM | 12 | ≥256 | 32  |
| 202107051 | 2021 | >15  | M | Metropole | None    | No | AMP CRO STR SMX TMP SXT TET NAL CIP AZM | 16 | ≥256 | 48  |
| 202107052 | 2021 | >15  | M | Metropole | None    | No | AMP CRO STR SMX TMP SXT TET NAL CIP AZM | 16 | ≥256 | 32  |
| 202107188 | 2021 | >15  | M | Metropole | Unknown | No | AMP CRO STR SMX TMP SXT NAL CIP AZM     | 16 | ≥256 | 32  |
| 202107323 | 2021 | >15  | M | Metropole | Unknown | No | AMP CRO STR SMX TMP SXT TET NAL CIP AZM | 16 | ≥256 | 32  |
| 202107395 | 2021 | >15  | M | Metropole | Unknown | No | AMP CRO STR SMX TMP SXT TET NAL CIP AZM | 6  | ≥256 | 48  |
| 202107415 | 2021 | >15  | M | Metropole | Unknown | No | AMP CRO STR SMX TMP SXT TET NAL CIP AZM | 6  | ≥256 | 48  |
| 202107446 | 2021 | >15  | M | Metropole | None    | No | AMP CRO STR SMX TMP SXT TET NAL CIP AZM | 12 | ≥256 | 48  |
| 202107466 | 2021 | >15  | M | Metropole | None    | No | AMP CRO STR SMX TMP SXT TET NAL CIP AZM | 6  | ≥256 | 192 |
| 202107818 | 2021 | >15  | M | Metropole | Unknown | No | AMP CRO STR SMX TMP SXT TET NAL CIP AZM | 6  | ≥256 | 32  |
| 202108294 | 2021 | >15  | M | Metropole | Unknown | No | AMP CRO STR SMX TMP SXT TET NAL CIP AZM | 12 | ≥256 | 24  |
| 202108535 | 2021 | >15  | F | Metropole | None    | No | AMP CRO STR SMX TMP SXT TET NAL CIP AZM | 1  | 96   | 16  |
| 202108795 | 2021 | >15  | M | Metropole | Unknown | No | AMP CRO STR SMX TMP SXT TET NAL CIP AZM | 6  | ≥256 | 24  |
| 202108919 | 2021 | >15  | M | Metropole | None    | No | AMP CRO STR SMX TMP SXT TET NAL CIP AZM | 4  | ≥256 | 24  |
| 202108953 | 2021 | >15  | M | Metropole | Unknown | No | AMP CRO STR SMX TMP SXT TET NAL CIP AZM | 8  | ≥256 | 48  |
| 202109588 | 2021 | >15  | M | Metropole | Unknown | No | AMP CRO STR SMX TMP SXT TET NAL CIP AZM | 6  | ≥256 | 24  |
| 202109651 | 2021 | >15  | M | Metropole | None    | No | AMP CRO STR SMX TMP SXT TET NAL CIP AZM | 4  | ≥256 | 24  |
| 202109656 | 2021 | >15  | M | Metropole | Unknown | No | AMP CRO STR SMX TMP SXT TET NAL CIP AZM | 16 | ≥256 | 24  |
| 202109849 | 2021 | >15  | M | Metropole | Unknown | No | AMP CRO STR SMX TMP SXT NAL CIP AZM     | 12 | ≥256 | 24  |
| 202109909 | 2021 | >15  | M | Metropole | Unknown | No | AMP CRO STR SMX TMP SXT TET NAL CIP AZM | 4  | ≥256 | 96  |

|           |      |     |   |           |         |    |                                         |    |      |    |
|-----------|------|-----|---|-----------|---------|----|-----------------------------------------|----|------|----|
| 202109960 | 2021 | >15 | M | Metropole | Unknown | No | AMP CRO STR SMX TMP SXT TET NAL CIP AZM | 6  | ≥256 | 48 |
| 202110146 | 2021 | >15 | M | Metropole | Unknown | No | AMP CRO STR SMX TMP SXT NAL CIP AZM     | 8  | ≥256 | 32 |
| 202110251 | 2021 | >15 | M | Metropole | Unknown | No | AMP CRO STR SMX TMP SXT NAL CIP AZM     | 8  | ≥256 | 24 |
| 202110403 | 2021 | >15 | M | Metropole | Unknown | No | AMP CRO STR SMX TMP SXT TET NAL CIP AZM | 12 | ≥256 | 32 |
| 202110415 | 2021 | >15 | M | Metropole | None    | No | AMP CRO STR SMX TMP SXT NAL CIP AZM     | 8  | ≥256 | 32 |
| 202110472 | 2021 | >15 | M | Metropole | None    | No | AMP CRO STR SMX TMP SXT TET NAL CIP AZM | 8  | ≥256 | 32 |
| 202110584 | 2021 | >15 | M | Metropole | Unknown | No | AMP CRO STR SMX TMP SXT NAL CIP AZM     | 8  | ≥256 | 32 |
| 202110641 | 2021 | >15 | M | Metropole | Unknown | No | AMP CRO STR SMX TMP SXT NAL CIP AZM     | 8  | ≥256 | 32 |
| 202110674 | 2021 | >15 | M | Metropole | Unknown | No | AMP CRO STR SMX TMP SXT NAL CIP AZM     | 8  | ≥256 | 24 |
| 202110841 | 2021 | >15 | M | Metropole | Spain   | No | AMP CRO STR SMX TMP SXT NAL CIP AZM     | 8  | ≥256 | 16 |
| 202110869 | 2021 | >15 | F | Metropole | Unknown | No | AMP CRO STR SMX TMP SXT NAL CIP AZM     | 16 | ≥256 | 48 |
| 202110877 | 2021 | >15 | M | Metropole | Unknown | No | AMP CRO STR SMX TMP SXT NAL CIP AZM     | 12 | ≥256 | 48 |
| 202110960 | 2021 | >15 | M | Metropole | Unknown | No | AMP CRO STR SMX TMP SXT TET NAL CIP AZM | 16 | ≥256 | 24 |
| 202110961 | 2021 | >15 | M | Metropole | Unknown | No | AMP CRO STR SMX TMP SXT TET NAL CIP AZM | 12 | ≥256 | 32 |
| 202111030 | 2021 | >15 | M | Metropole | Unknown | No | AMP CRO STR SMX TMP SXT TET NAL CIP AZM | 12 | ≥256 | 24 |
| 202111082 | 2021 | >15 | M | Metropole | Unknown | No | AMP CRO STR SMX TMP SXT TET NAL CIP AZM | 12 | ≥256 | 32 |
| 202111134 | 2021 | >15 | M | Metropole | Unknown | No | AMP CRO STR SMX TMP SXT TET NAL CIP AZM | 4  | ≥256 | 24 |
| 202111144 | 2021 | >15 | M | Metropole | Unknown | No | AMP CRO STR SMX TMP SXT TET NAL CIP AZM | 8  | 192  | 48 |
| 202111184 | 2021 | >15 | M | Metropole | None    | No | AMP CRO STR SMX TMP SXT NAL CIP AZM     | 12 | ≥256 | 24 |
| 202200143 | 2021 | >15 | M | Metropole | Unknown | No | AMP CRO STR SMX TMP SXT NAL CIP AZM     | 8  | ≥256 | 48 |

M, male; F, female; MIC; minimum inhibitory concentration; AMP, ampicillin; CRO, ceftriaxone; STR, streptomycin; SMX, sulfamethoxazole; TMP, trimethoprim; TET, tetracycline; NAL, nalidixic acid; CIP, ciprofloxacin; AZM, azithromycin.

**Supplementary Table 2.** Genomic characteristics for the 164 XDR *S. sonnei* isolates under study.

| Isolate   | Cluster | Genotype  | Genotype alias | Acquired antimicrobial drug resistance genes                                                                                                                         | QRDR mutation |             | Accession no. |
|-----------|---------|-----------|----------------|----------------------------------------------------------------------------------------------------------------------------------------------------------------------|---------------|-------------|---------------|
|           |         |           |                |                                                                                                                                                                      | <i>gyrA</i>   | <i>parC</i> |               |
| 201701093 | X1      | 3.6.1.1   | CipR           | <i>bla</i> <sub>CTX-M-15</sub> , <i>sul1</i> , <i>dfrA1</i> , <i>dfrA5</i> , <i>qnrS13</i> , <i>mph(A)</i> , <i>erm(B)</i>                                           | S83L          | S80I        | ERS6492764    |
| 202005154 | X1      | 3.6.1.1   | CipR           | <i>bla</i> <sub>CTX-M-15</sub> , <i>sul1</i> , <i>dfrA1</i> , <i>dfrA5</i> , <i>qnrS13</i> , <i>mph(A)</i> , <i>erm(B)</i>                                           | S83L          | S80I        | ERS6576287    |
| 201903956 | X2      | 3.6.1.1.1 | CipR.SEA       | <i>bla</i> <sub>CTX-M-27</sub> , <i>strA</i> , <i>strB</i> , <i>aadA5</i> , <i>sul1</i> , <i>sul2</i> , <i>dfrA1</i> , <i>dfrA17</i> , <i>tet(A)</i> , <i>mph(A)</i> | S83L, D87G    | S80I        | ERS6495067    |
| 201502874 | X3      | 3.6.1.1.1 | CipR.SEA       | <i>bla</i> <sub>CTX-M-27</sub> , <i>strA</i> , <i>strB</i> , <i>aadA5</i> , <i>sul1</i> , <i>sul2</i> , <i>dfrA1</i> , <i>dfrA17</i> , <i>tet(A)</i> , <i>mph(A)</i> | S83L, D87G    | S80I        | ERS12446082   |
| 201603898 | X4      | 3.6.1.1.1 | CipR.SEA       | <i>bla</i> <sub>CTX-M-55</sub> , <i>strA</i> , <i>strB</i> , <i>aac(3)-IIa</i> , <i>sul2</i> , <i>dfrA1</i> , <i>tet(A)</i> , <i>mph(A)</i>                          | S83L, D87G    | S80I        | ERS12446174   |
| 201702421 | X4      | 3.6.1.1.1 | CipR.SEA       | <i>bla</i> <sub>CTX-M-55</sub> , <i>strA</i> , <i>strB</i> , <i>aac(3)-IIa</i> , <i>sul2</i> , <i>dfrA1</i> , <i>tet(A)</i> , <i>mph(A)</i>                          | S83L, D87G    | S80I        | ERS6495734    |
| 201702422 | X4      | 3.6.1.1.1 | CipR.SEA       | <i>bla</i> <sub>CTX-M-55</sub> , <i>strA</i> , <i>strB</i> , <i>aac(3)-IIa</i> , <i>sul2</i> , <i>dfrA1</i> , <i>tet(A)</i> , <i>mph(A)</i>                          | S83L, D87G    | S80I        | ERS6495735    |
| 201702423 | X4      | 3.6.1.1.1 | CipR.SEA       | <i>bla</i> <sub>CTX-M-55</sub> , <i>strA</i> , <i>strB</i> , <i>aac(3)-IIa</i> , <i>sul2</i> , <i>dfrA1</i> , <i>tet(A)</i> , <i>mph(A)</i>                          | S83L, D87G    | S80I        | ERS6495736    |
| 201702424 | X4      | 3.6.1.1.1 | CipR.SEA       | <i>bla</i> <sub>CTX-M-55</sub> , <i>strA</i> , <i>strB</i> , <i>aac(3)-IIa</i> , <i>sul2</i> , <i>dfrA1</i> , <i>tet(A)</i> , <i>mph(A)</i>                          | S83L, D87G    | S80I        | ERS6495737    |
| 201702425 | X4      | 3.6.1.1.1 | CipR.SEA       | <i>bla</i> <sub>CTX-M-55</sub> , <i>strA</i> , <i>strB</i> , <i>aac(3)-IIa</i> , <i>sul2</i> , <i>dfrA1</i> , <i>tet(A)</i> , <i>mph(A)</i>                          | S83L, D87G    | S80I        | ERS6495738    |
| 201702483 | X4      | 3.6.1.1.1 | CipR.SEA       | <i>bla</i> <sub>CTX-M-55</sub> , <i>strA</i> , <i>strB</i> , <i>aac(3)-IIa</i> , <i>sul2</i> , <i>dfrA1</i> , <i>tet(A)</i> , <i>mph(A)</i>                          | S83L, D87G    | S80I        | ERS6495742    |
| 201702484 | X4      | 3.6.1.1.1 | CipR.SEA       | <i>bla</i> <sub>CTX-M-55</sub> , <i>strA</i> , <i>strB</i> , <i>aac(3)-IIa</i> , <i>sul2</i> , <i>dfrA1</i> , <i>tet(A)</i> , <i>mph(A)</i>                          | S83L, D87G    | S80I        | ERS6495743    |
| 201702485 | X4      | 3.6.1.1.1 | CipR.SEA       | <i>bla</i> <sub>CTX-M-55</sub> , <i>strA</i> , <i>strB</i> , <i>aac(3)-IIa</i> , <i>sul2</i> , <i>dfrA1</i> , <i>tet(A)</i> , <i>mph(A)</i>                          | S83L, D87G    | S80I        | ERS6495744    |
| 201702486 | X4      | 3.6.1.1.1 | CipR.SEA       | <i>bla</i> <sub>CTX-M-55</sub> , <i>strA</i> , <i>strB</i> , <i>aac(3)-IIa</i> , <i>sul2</i> , <i>dfrA1</i> , <i>tet(A)</i> , <i>mph(A)</i>                          | S83L, D87G    | S80I        | ERS6495745    |
| 201702487 | X4      | 3.6.1.1.1 | CipR.SEA       | <i>bla</i> <sub>CTX-M-55</sub> , <i>strA</i> , <i>strB</i> , <i>aac(3)-IIa</i> , <i>sul2</i> , <i>dfrA1</i> , <i>tet(A)</i> , <i>mph(A)</i>                          | S83L, D87G    | S80I        | ERS6495746    |
| 201702488 | X4      | 3.6.1.1.1 | CipR.SEA       | <i>bla</i> <sub>CTX-M-55</sub> , <i>strA</i> , <i>strB</i> , <i>aac(3)-IIa</i> , <i>sul2</i> , <i>dfrA1</i> , <i>tet(A)</i> , <i>mph(A)</i>                          | S83L, D87G    | S80I        | ERS6495747    |
| 201702489 | X4      | 3.6.1.1.1 | CipR.SEA       | <i>bla</i> <sub>CTX-M-55</sub> , <i>strA</i> , <i>strB</i> , <i>aac(3)-IIa</i> , <i>sul2</i> , <i>dfrA1</i> , <i>tet(A)</i> , <i>mph(A)</i>                          | S83L, D87G    | S80I        | ERS6495748    |
| 201702490 | X4      | 3.6.1.1.1 | CipR.SEA       | <i>bla</i> <sub>CTX-M-55</sub> , <i>strA</i> , <i>strB</i> , <i>aac(3)-IIa</i> , <i>sul2</i> , <i>dfrA1</i> , <i>tet(A)</i> , <i>mph(A)</i>                          | S83L, D87G    | S80I        | ERS6495749    |
| 201702491 | X4      | 3.6.1.1.1 | CipR.SEA       | <i>bla</i> <sub>CTX-M-55</sub> , <i>strA</i> , <i>strB</i> , <i>aac(3)-IIa</i> , <i>sul2</i> , <i>dfrA1</i> , <i>tet(A)</i> , <i>mph(A)</i>                          | S83L, D87G    | S80I        | ERS6495750    |
| 201702544 | X4      | 3.6.1.1.1 | CipR.SEA       | <i>bla</i> <sub>CTX-M-55</sub> , <i>strA</i> , <i>strB</i> , <i>aac(3)-IIa</i> , <i>sul2</i> , <i>dfrA1</i> , <i>tet(A)</i> , <i>mph(A)</i>                          | S83L, D87G    | S80I        | ERS6495756    |
| 201702545 | X4      | 3.6.1.1.1 | CipR.SEA       | <i>bla</i> <sub>CTX-M-55</sub> , <i>strA</i> , <i>strB</i> , <i>aac(3)-IIa</i> , <i>sul2</i> , <i>dfrA1</i> , <i>tet(A)</i> , <i>mph(A)</i>                          | S83L, D87G    | S80I        | ERS6495757    |
| 201702562 | X4      | 3.6.1.1.1 | CipR.SEA       | <i>bla</i> <sub>CTX-M-55</sub> , <i>strA</i> , <i>strB</i> , <i>aac(3)-IIa</i> , <i>sul2</i> , <i>dfrA1</i> , <i>tet(A)</i> , <i>mph(A)</i>                          | S83L, D87G    | S80I        | ERS6495758    |
| 201702563 | X4      | 3.6.1.1.1 | CipR.SEA       | <i>bla</i> <sub>CTX-M-55</sub> , <i>strA</i> , <i>strB</i> , <i>aac(3)-IIa</i> , <i>sul2</i> , <i>dfrA1</i> , <i>tet(A)</i> , <i>mph(A)</i>                          | S83L, D87G    | S80I        | ERS6495759    |
| 201702620 | X4      | 3.6.1.1.1 | CipR.SEA       | <i>bla</i> <sub>CTX-M-55</sub> , <i>strA</i> , <i>strB</i> , <i>aac(3)-IIa</i> , <i>sul2</i> , <i>dfrA1</i> , <i>tet(A)</i> , <i>mph(A)</i>                          | S83L, D87G    | S80I        | ERS6495761    |
| 201702781 | X4      | 3.6.1.1.1 | CipR.SEA       | <i>bla</i> <sub>CTX-M-55</sub> , <i>strA</i> , <i>strB</i> , <i>aac(3)-IIa</i> , <i>sul2</i> , <i>dfrA1</i> , <i>tet(A)</i> , <i>mph(A)</i>                          | S83L, D87G    | S80I        | ERS6495763    |
| 201702782 | X4      | 3.6.1.1.1 | CipR.SEA       | <i>bla</i> <sub>CTX-M-55</sub> , <i>strA</i> , <i>strB</i> , <i>aac(3)-IIa</i> , <i>sul2</i> , <i>dfrA1</i> , <i>tet(A)</i> , <i>mph(A)</i>                          | S83L, D87G    | S80I        | ERS6495764    |
| 201702783 | X4      | 3.6.1.1.1 | CipR.SEA       | <i>bla</i> <sub>CTX-M-55</sub> , <i>strA</i> , <i>strB</i> , <i>aac(3)-IIa</i> , <i>sul2</i> , <i>dfrA1</i> , <i>tet(A)</i> , <i>mph(A)</i>                          | S83L, D87G    | S80I        | ERS6495765    |
| 201702784 | X4      | 3.6.1.1.1 | CipR.SEA       | <i>bla</i> <sub>CTX-M-55</sub> , <i>strA</i> , <i>strB</i> , <i>aac(3)-IIa</i> , <i>sul2</i> , <i>dfrA1</i> , <i>tet(A)</i> , <i>mph(A)</i>                          | S83L, D87G    | S80I        | ERS6495766    |
| 201702786 | X4      | 3.6.1.1.1 | CipR.SEA       | <i>bla</i> <sub>CTX-M-55</sub> , <i>strA</i> , <i>strB</i> , <i>aac(3)-IIa</i> , <i>sul2</i> , <i>dfrA1</i> , <i>tet(A)</i> , <i>mph(A)</i>                          | S83L, D87G    | S80I        | ERS6495768    |
| 201702787 | X4      | 3.6.1.1.1 | CipR.SEA       | <i>bla</i> <sub>CTX-M-55</sub> , <i>strA</i> , <i>strB</i> , <i>aac(3)-IIa</i> , <i>sul2</i> , <i>dfrA1</i> , <i>tet(A)</i> , <i>mph(A)</i>                          | S83L, D87G    | S80I        | ERS6575823    |
| 201702788 | X4      | 3.6.1.1.1 | CipR.SEA       | <i>bla</i> <sub>CTX-M-55</sub> , <i>strA</i> , <i>strB</i> , <i>aac(3)-IIa</i> , <i>sul2</i> , <i>dfrA1</i> , <i>tet(A)</i> , <i>mph(A)</i>                          | S83L, D87G    | S80I        | ERS6575824    |
| 201702789 | X4      | 3.6.1.1.1 | CipR.SEA       | <i>bla</i> <sub>CTX-M-55</sub> , <i>strA</i> , <i>strB</i> , <i>aac(3)-IIa</i> , <i>sul2</i> , <i>dfrA1</i> , <i>tet(A)</i> , <i>mph(A)</i>                          | S83L, D87G    | S80I        | ERS6575825    |
| 201702790 | X4      | 3.6.1.1.1 | CipR.SEA       | <i>bla</i> <sub>CTX-M-55</sub> , <i>strA</i> , <i>strB</i> , <i>aac(3)-IIa</i> , <i>sul2</i> , <i>dfrA1</i> , <i>tet(A)</i> , <i>mph(A)</i>                          | S83L, D87G    | S80I        | ERS6575826    |
| 201702791 | X4      | 3.6.1.1.1 | CipR.SEA       | <i>bla</i> <sub>CTX-M-55</sub> , <i>strA</i> , <i>strB</i> , <i>aac(3)-IIa</i> , <i>sul2</i> , <i>dfrA1</i> , <i>tet(A)</i> , <i>mph(A)</i>                          | S83L, D87G    | S80I        | ERS6575827    |
| 201702847 | X4      | 3.6.1.1.1 | CipR.SEA       | <i>bla</i> <sub>CTX-M-55</sub> , <i>strA</i> , <i>strB</i> , <i>aac(3)-IIa</i> , <i>sul2</i> , <i>dfrA1</i> , <i>tet(A)</i> , <i>mph(A)</i>                          | S83L, D87G    | S80I        | ERS6575830    |
| 201703089 | X4      | 3.6.1.1.1 | CipR.SEA       | <i>bla</i> <sub>CTX-M-55</sub> , <i>strA</i> , <i>strB</i> , <i>aac(3)-IIa</i> , <i>sul2</i> , <i>dfrA1</i> , <i>tet(A)</i> , <i>mph(A)</i>                          | S83L, D87G    | S80I        | ERS6575842    |
| 201703090 | X4      | 3.6.1.1.1 | CipR.SEA       | <i>bla</i> <sub>CTX-M-55</sub> , <i>strA</i> , <i>strB</i> , <i>aac(3)-IIa</i> , <i>sul2</i> , <i>dfrA1</i> , <i>tet(A)</i> , <i>mph(A)</i>                          | S83L, D87G    | S80I        | ERS6575843    |

|           |     |           |           |                                                                                                       |            |      |             |
|-----------|-----|-----------|-----------|-------------------------------------------------------------------------------------------------------|------------|------|-------------|
| 201802246 | X4  | 3.6.1.1.1 | CipR.SEA  | <i>blactX-M-55, strA, strB, sul2, dfrA1, tet(A), mph(A)</i>                                           | S83L, D87G | S80I | ERS6575238  |
| 201703128 | X5  | 3.6.1.1   | CipR      | <i>blactX-M-15, aadA5, sul1, dfrA1, dfrA17, qnrS1, mph(A)</i>                                         | S83L, D87G | S80I | ERS6575844  |
| 201703316 | X5  | 3.6.1.1   | CipR      | <i>blactX-M-15, aadA5, sul1, dfrA1, dfrA17, qnrS1, mph(A)</i>                                         | S83L, D87G | S80I | ERS6575847  |
| 201908033 | X6  | 3.6.1.1   | CipR      | <i>blactX-M-15, strA, strB, sul2, dfrA1, tet(A), mph(A), erm(B)</i>                                   | S83L, D87G | S80I | ERS6495503  |
| 201605743 | X7  | 3.6.1.1.2 | CipR.MSM5 | <i>blaTEM-1b, blactX-M-3, aadA5, sul1, dfrA1, dfrA17, mph(A), erm(B)</i>                              | S83L, D87G | S80I | ERS12446187 |
| 201807563 | X8  | 3.6.1.1.2 | CipR.MSM5 | <i>blaTEM-1b, blactX-M-15, aadA1, aadA5, sul1, sul2, dfrA1, dfrA17, tet(B), qnrS1, mph(A), erm(B)</i> | S83L, D87G | S80I | ERS6575531  |
| 201808736 | X8  | 3.6.1.1.2 | CipR.MSM5 | <i>blaTEM-1b, blactX-M-15, aadA1, aadA5, sul1, sul2, dfrA1, dfrA17, tet(B), qnrS1, mph(A), erm(B)</i> | S83L, D87G | S80I | ERS6492807  |
| 201809101 | X8  | 3.6.1.1.2 | CipR.MSM5 | <i>blaTEM-1b, blactX-M-15, aadA1, aadA5, sul1, sul2, dfrA1, dfrA17, tet(B), qnrS1, mph(A), erm(B)</i> | S83L, D87G | S80I | ERS6492833  |
| 201810383 | X8  | 3.6.1.1.2 | CipR.MSM5 | <i>blaTEM-1b, blactX-M-15, aadA1, aadA5, sul1, sul2, dfrA1, dfrA17, tet(B), qnrS1, mph(A), erm(B)</i> | S83L, D87G | S80I | ERS6494748  |
| 201810803 | X8  | 3.6.1.1.2 | CipR.MSM5 | <i>blaTEM-1b, blactX-M-15, aadA1, aadA5, sul1, sul2, dfrA1, dfrA17, tet(B), qnrS1, mph(A), erm(B)</i> | S83L, D87G | S80I | ERS6494788  |
| 201900053 | X8  | 3.6.1.1.2 | CipR.MSM5 | <i>blaTEM-1b, blactX-M-15, aadA1, aadA5, sul1, sul2, dfrA1, dfrA17, tet(B), qnrS1, mph(A), erm(B)</i> | S83L, D87G | S80I | ERS6575939  |
| 201904981 | X8  | 3.6.1.1.2 | CipR.MSM5 | <i>blaTEM-1b, blactX-M-15, aadA1, aadA5, sul1, sul2, dfrA1, dfrA17, tet(B), qnrS1, mph(A), erm(B)</i> | S83L, D87G | S80I | ERS6495091  |
| 201909147 | X8  | 3.6.1.1.2 | CipR.MSM5 | <i>blaTEM-1b, blactX-M-15, aadA1, aadA5, sul1, sul2, dfrA1, dfrA17, tet(B), qnrS1, mph(A), erm(B)</i> | S83L, D87G | S80I | ERS6495579  |
| 201910769 | X8  | 3.6.1.1.2 | CipR.MSM5 | <i>blaTEM-1b, blactX-M-15, aadA1, aadA5, sul1, sul2, dfrA1, dfrA17, tet(B), qnrS1, mph(A), erm(B)</i> | S83L, D87G | S80I | ERS6575039  |
| 201910803 | X8  | 3.6.1.1.2 | CipR.MSM5 | <i>blaTEM-1b, blactX-M-15, aadA1, aadA5, sul1, sul2, dfrA1, dfrA17, tet(B), qnrS1, mph(A), erm(B)</i> | S83L, D87G | S80I | ERS6575045  |
| 202000267 | X9  | 3.6.1.1.2 | CipR.MSM5 | <i>blactX-M-134, strA, strB, sul2, dfrA1, tet(A), mph(A)</i>                                          | S83L, D87G | S80I | ERS6495836  |
| 202000322 | X9  | 3.6.1.1.2 | CipR.MSM5 | <i>blactX-M-134, strA, strB, sul2, dfrA1, tet(A), mph(A)</i>                                          | S83L, D87G | S80I | ERS6495841  |
| 202000562 | X9  | 3.6.1.1.2 | CipR.MSM5 | <i>blactX-M-134, strA, strB, sul2, dfrA1, tet(A), mph(A)</i>                                          | S83L, D87G | S80I | ERS6575389  |
| 202001062 | X9  | 3.6.1.1.2 | CipR.MSM5 | <i>blactX-M-134, strA, strB, sul2, dfrA1, tet(A), mph(A)</i>                                          | S83L, D87G | S80I | ERS6576215  |
| 202001063 | X9  | 3.6.1.1.2 | CipR.MSM5 | <i>blactX-M-134, strA, strB, sul2, dfrA1, tet(A), mph(A)</i>                                          | S83L, D87G | S80I | ERS6576216  |
| 202001623 | X9  | 3.6.1.1.2 | CipR.MSM5 | <i>blactX-M-134, strA, strB, sul2, dfrA1, tet(A), mph(A)</i>                                          | S83L, D87G | S80I | ERS6576007  |
| 202006637 | X10 | 3.6.1.1.2 | CipR.MSM5 | <i>blactX-M-27, strA, strB, aadA5, sul1, sul2, dfrA1, dfrA17, tet(A), qnrB19, mph(A), erm(B)</i>      | S83L, D87G | S80I | ERS6576310  |
| 202007856 | X10 | 3.6.1.1.2 | CipR.MSM5 | <i>blactX-M-27, strA, strB, aadA5, sul1, sul2, dfrA1, dfrA17, tet(A), qnrB19, mph(A), erm(B)</i>      | S83L, D87G | S80I | ERS6576333  |
| 202008118 | X10 | 3.6.1.1.2 | CipR.MSM5 | <i>blactX-M-27, strA, strB, aadA5, sul1, sul2, dfrA1, dfrA17, tet(A), qnrB19, mph(A)</i>              | S83L, D87G | S80I | ERS12446247 |
| 202008158 | X10 | 3.6.1.1.2 | CipR.MSM5 | <i>blactX-M-27, strA, strB, aadA5, sul1, sul2, dfrA1, dfrA17, tet(A), qnrB19, mph(A), erm(B)</i>      | S83L, D87G | S80I | ERS6576346  |
| 202008564 | X10 | 3.6.1.1.2 | CipR.MSM5 | <i>blactX-M-27, strA, strB, aadA5, sul1, sul2, dfrA1, dfrA17, tet(A), qnrB19, mph(A), erm(B)</i>      | S83L, D87G | S80I | ERS6576362  |
| 202008707 | X10 | 3.6.1.1.2 | CipR.MSM5 | <i>blactX-M-27, strA, strB, aadA5, sul1, sul2, dfrA1, dfrA17, tet(A), qnrB19, mph(A)</i>              | S83L, D87G | S80I | ERS6578764  |
| 202100373 | X10 | 3.6.1.1.2 | CipR.MSM5 | <i>blactX-M-27, strA, strB, aadA5, sul1, sul2, dfrA1, dfrA17, tet(A), qnrB19, mph(A)</i>              | S83L, D87G | S80I | ERS12156949 |
| 202100420 | X10 | 3.6.1.1.2 | CipR.MSM5 | <i>blactX-M-27, strA, strB, aadA5, sul1, sul2, dfrA1, dfrA17, tet(A), qnrB19, mph(A)</i>              | S83L, D87G | S80I | ERS12156952 |
| 202100759 | X10 | 3.6.1.1.2 | CipR.MSM5 | <i>blactX-M-27, strA, strB, aadA5, sul1, sul2, dfrA1, dfrA17, tet(A), qnrB19, mph(A), erm(B)</i>      | S83L, D87G | S80I | ERS12156964 |
| 202101412 | X10 | 3.6.1.1.2 | CipR.MSM5 | <i>blactX-M-27, strA, strB, aadA5, sul1, sul2, dfrA1, dfrA17, tet(A), qnrB19, mph(A), erm(B)</i>      | S83L, D87G | S80I | ERS12156980 |
| 202101541 | X10 | 3.6.1.1.2 | CipR.MSM5 | <i>blactX-M-27, aadA5, sul1, dfrA1, dfrA17, qnrB19, mph(A), erm(B)</i>                                | S83L, D87G | S80I | ERS12156987 |
| 202101624 | X10 | 3.6.1.1.2 | CipR.MSM5 | <i>blactX-M-27, strA, strB, aadA5, sul1, sul2, dfrA1, dfrA17, tet(A), qnrB19, mph(A), erm(B)</i>      | S83L, D87G | S80I | ERS12156996 |
| 202101651 | X10 | 3.6.1.1.2 | CipR.MSM5 | <i>blactX-M-27, strA, strB, aadA5, sul1, sul2, dfrA1, dfrA17, tet(A), qnrB19, mph(A), erm(B)</i>      | S83L, D87G | S80I | ERS12156997 |
| 202101727 | X10 | 3.6.1.1.2 | CipR.MSM5 | <i>blactX-M-27, strA, strB, aadA5, sul1, sul2, dfrA1, dfrA17, tet(A), qnrB19, mph(A), erm(B)</i>      | S83L, D87G | S80I | ERS12157001 |
| 202101879 | X10 | 3.6.1.1.2 | CipR.MSM5 | <i>blactX-M-27, strA, strB, aadA5, sul1, sul2, dfrA1, dfrA17, tet(A), qnrB19, mph(A), erm(B)</i>      | S83L, D87G | S80I | ERS12157007 |
| 202101885 | X10 | 3.6.1.1.2 | CipR.MSM5 | <i>blactX-M-27, strA, strB, aadA5, sul1, sul2, dfrA1, dfrA17, tet(A), qnrB19, mph(A)</i>              | S83L, D87G | S80I | ERS12157008 |
| 202101930 | X10 | 3.6.1.1.2 | CipR.MSM5 | <i>blactX-M-27, strA, strB, aadA5, sul1, sul2, dfrA1, dfrA17, tet(A), qnrB19, mph(A), erm(B)</i>      | S83L, D87G | S80I | ERS12157011 |
| 202102119 | X10 | 3.6.1.1.2 | CipR.MSM5 | <i>blactX-M-27, strA, strB, aadA5, sul1, sul2, dfrA1, dfrA17, tet(A), qnrB19, mph(A), erm(B)</i>      | S83L, D87G | S80I | ERS12157014 |
| 202102200 | X10 | 3.6.1.1.2 | CipR.MSM5 | <i>blactX-M-27, strA, strB, aadA5, sul1, sul2, dfrA1, dfrA17, tet(A), qnrB19, mph(A), erm(B)</i>      | S83L, D87G | S80I | ERS12446248 |
| 202102776 | X10 | 3.6.1.1.2 | CipR.MSM5 | <i>blactX-M-27, strA, strB, aadA5, sul1, sul2, dfrA1, dfrA17, tet(A), qnrB19, mph(A), erm(B)</i>      | S83L, D87G | S80I | ERS12157026 |
| 202102820 | X10 | 3.6.1.1.2 | CipR.MSM5 | <i>blactX-M-27, strA, strB, aadA5, sul1, sul2, dfrA1, dfrA17, tet(A), qnrB19, mph(A), erm(B)</i>      | S83L, D87G | S80I | ERS12157027 |
| 202102980 | X10 | 3.6.1.1.2 | CipR.MSM5 | <i>blactX-M-27, strA, strB, aadA5, sul1, sul2, dfrA1, dfrA17, tet(A), qnrB19, mph(A)</i>              | S83L, D87G | S80I | ERS12157031 |







**Supplementary Table 3.** Description of the AMR elements identified after long-read sequencing

| Genotype                   | XDR cluster | Isolate   | QRDR mutations |             | Chromosomal AMR genes <sup>#</sup>            | AMR plasmids                                  |                             |                       |                       |                                                                                                                                                                                                                                       | GenBank accession nos.           |
|----------------------------|-------------|-----------|----------------|-------------|-----------------------------------------------|-----------------------------------------------|-----------------------------|-----------------------|-----------------------|---------------------------------------------------------------------------------------------------------------------------------------------------------------------------------------------------------------------------------------|----------------------------------|
|                            |             |           | <i>gyrA</i>    | <i>parC</i> |                                               | Name                                          | Size in kb                  | Inc type <sup>‡</sup> | PTU type <sup>‡</sup> | AMR genes                                                                                                                                                                                                                             |                                  |
| <b>3.6.1_CipR-parent</b>   |             |           |                |             |                                               |                                               |                             |                       |                       |                                                                                                                                                                                                                                       |                                  |
|                            | X12         | 202106367 | S83L           |             | <i>dfrA1</i>                                  | p202106367-3<br>p202106367-6                  | 87,521<br>8,379             | FII<br>NT             | FE<br>NT              | <i>bla</i> <sub>CTX-M-15</sub> , <i>mph(A)</i> , <i>qnrS1</i><br><i>strA</i> , <i>strB</i> , <i>sul2</i> , <i>tet(A)</i>                                                                                                              | OP038295<br>OP038296             |
|                            |             | 202108535 | S83L           |             | <i>dfrA1</i>                                  | p202108535-3<br>p202108535-7<br>p202108535-13 | 87,540<br>8,379<br>2,699    | FII<br>NT<br>Col(pH)  | FE<br>NT<br>E62       | <i>bla</i> <sub>CTX-M-15</sub> , <i>mph(A)</i> , <i>qnrS1</i><br><i>strA</i> , <i>strB</i> , <i>sul2</i> , <i>tet(A)</i><br><i>qnrB19</i>                                                                                             | OP038298<br>OP038299<br>OP038297 |
| <b>3.6.1.1_CipR</b>        |             |           |                |             |                                               |                                               |                             |                       |                       |                                                                                                                                                                                                                                       |                                  |
|                            | X1          | 201701093 | S83L           | S80I        | <i>bla</i> <sub>CTX-M-15</sub> , <i>dfrA1</i> | p201701093-2                                  | 102,387                     | B/O/K/Z               | B/O/K/Z               | <i>sul1</i> , <i>dfrA5</i> , <i>mph(A)</i> , <i>erm(B)</i> , <i>qnrS13</i>                                                                                                                                                            | OP038271                         |
|                            | X5          | 201703316 | S83L, D87G     | S80I        | <i>dfrA1</i>                                  | p201703316-2                                  | 82,941                      | FII                   | FE                    | <i>bla</i> <sub>CTX-M-15</sub> , <i>aadA5</i> , <i>sul1</i> , <i>dfrA17</i> , <i>mph(A)</i> , <i>qnrS1</i>                                                                                                                            | OP038274                         |
|                            | X6          | 201908033 | S83L, D87G     | S80I        | <i>bla</i> <sub>CTX-M-15</sub> , <i>dfrA1</i> | p201908033-3<br>p201908033-4                  | 73,493<br>8,401             | FII<br>NT             | FE<br>E63             | <i>mph(A)</i> , <i>erm(B)</i><br><i>strA</i> , <i>strB</i> , <i>sul2</i> , <i>tet(A)</i>                                                                                                                                              | OP038279<br>OP038280             |
| <b>3.6.1.1.1_CipR.SEA</b>  |             |           |                |             |                                               |                                               |                             |                       |                       |                                                                                                                                                                                                                                       |                                  |
|                            | X2          | 201903956 | S83L, D87G     | S80I        | <i>dfrA1</i>                                  | p201903956-2<br>p201903956-4                  | 78,123<br>8,401             | FII<br>NT             | FE<br>E63             | <i>bla</i> <sub>CTX-M-27</sub> , <i>aadA5</i> , <i>sul1</i> , <i>dfrA17</i> , <i>mph(A)</i><br><i>strA</i> , <i>strB</i> , <i>sul2</i> , <i>tet(A)</i>                                                                                | OP038278<br>OP038303             |
|                            | X3          | 201502874 | S83L, D87G     | S80I        | <i>dfrA1</i>                                  | p201502874-3<br>p201502874-5                  | 79,375<br>8,401             | FII<br>NT             | FE<br>NT              | <i>bla</i> <sub>CTX-M-27</sub> , <i>aadA5</i> , <i>sul1</i> , <i>dfrA17</i> , <i>mph(A)</i><br><i>strA</i> , <i>strB</i> , <i>sul2</i> , <i>tet(A)</i>                                                                                | OP038267<br>OP038268             |
|                            | X4          | 201603898 | S83L, D87G     | S80I        | <i>dfrA1</i>                                  | p201603898-2<br>p201603898-4                  | 102,642<br>8,401            | B/O/K/Z<br>NT         | B/O/K/Z<br>NT         | <i>bla</i> <sub>CTX-M-55</sub> , <i>aac(3)-IIa</i> , <i>mph(A)</i><br><i>strA</i> , <i>strB</i> , <i>sul2</i> , <i>tet(A)</i>                                                                                                         | OP038269<br>OP038270             |
|                            |             | 201702782 | S83L, D87G     | S80I        | <i>dfrA1</i>                                  | p201702782-2<br>p201702782-3                  | 97,029<br>8,401             | B/O/K/Z<br>NT         | B/O/K/Z<br>E63        | <i>bla</i> <sub>CTX-M-55</sub> , <i>aac(3)-IIa</i> , <i>mph(A)</i><br><i>strA</i> , <i>strB</i> , <i>sul2</i> , <i>tet(A)</i>                                                                                                         | OP038272<br>OP038273             |
| <b>3.6.1.1.2_CipR.MSM5</b> |             |           |                |             |                                               |                                               |                             |                       |                       |                                                                                                                                                                                                                                       |                                  |
|                            | X7          | 201605743 | S83L, D87G     | S80I        | <i>dfrA1</i>                                  | p201605743-3<br>p201605743-4                  | 84,796<br>80,127            | I1<br>FII             | I1<br>FE              | <i>bla</i> <sub>CTX-M-3</sub><br><i>bla</i> <sub>TEM-1B</sub> , <i>aadA5</i> , <i>sul1</i> , <i>dfrA17</i> , <i>mph(A)</i> , <i>erm(B)</i>                                                                                            | OP038300<br>OP038301             |
|                            | X8          | 201809101 | S83L, D87G     | S80I        | <i>dfrA1</i>                                  | p201809101-4<br>p201809101-5*<br>p201809101-6 | 106,936<br>88,949<br>80,134 | I1<br>B/O/K/Z<br>FII  | I1<br>B/O/K/Z<br>FE   | <i>bla</i> <sub>CTX-M-15</sub> , <i>aadA1</i> , <i>sul2</i> , <i>dfrA1</i> , <i>qnrS1</i><br><i>sul2</i> , <i>tet(B)</i><br><i>bla</i> <sub>TEM-1B</sub> , <i>aadA5</i> , <i>sul1</i> , <i>dfrA17</i> , <i>mph(A)</i> , <i>erm(B)</i> | OP038275<br>OP038276<br>OP038277 |
|                            | X9          | 202000562 | S83L, D87G     | S80I        | <i>dfrA1</i>                                  | p202000562-4<br>p202000562-5                  | 76,702<br>8,379             | FII<br>NT             | FE<br>NT              | <i>bla</i> <sub>CTX-M-134</sub> , <i>strA</i> , <i>sul2</i> , <i>mph(A)</i><br><i>strA</i> , <i>strB</i> , <i>sul2</i> , <i>tet(A)</i>                                                                                                | OP038284<br>OP038285             |
|                            | X10         | 202008118 | S83L, D87G     | S80I        | <i>dfrA1</i>                                  | p202008118-4<br>p202008118-7<br>p202008118-16 | 78,102<br>8,390<br>2,579    | FII<br>NT<br>Col(pH)  | FE<br>NT<br>E76       | <i>bla</i> <sub>CTX-M-27</sub> , <i>aadA5</i> , <i>sul1</i> , <i>dfrA17</i> , <i>mph(A)</i><br><i>strA</i> , <i>strB</i> , <i>sul2</i> , <i>tet(A)</i><br><i>qnrB19</i>                                                               | OP038287<br>OP038288<br>OP038286 |

|     |           |            |      |              |               |        |         |     |                                                                                                             |          |
|-----|-----------|------------|------|--------------|---------------|--------|---------|-----|-------------------------------------------------------------------------------------------------------------|----------|
|     | 202008564 | S83L, D87G | S80I | <i>dfrA1</i> | p202008564-6  | 83,397 | FII     | FE  | <i>bla</i> <sub>CTX-M-27</sub> , <i>aadA5</i> , <i>sul1</i> , <i>dfrA17</i> , <i>mph(A)</i> , <i>erm(B)</i> | OP038290 |
|     |           |            |      |              | p202008564-7  | 8,390  | NT      | NT  | <i>strA</i> , <i>strB</i> , <i>sul2</i> , <i>tet(A)</i>                                                     | OP038291 |
|     |           |            |      |              | p202008564-21 | 2,579  | Col(pH) | E76 | <i>qnrB19</i>                                                                                               | OP038289 |
| X11 | 201908234 | S83L, D87G | S80I | <i>dfrA1</i> | p201908234-4  | 86,101 | II      | II  | <i>bla</i> <sub>CTX-M-3</sub>                                                                               | OP038281 |
|     |           |            |      |              | p201908234-5  | 82,851 | FII     | FE  | <i>bla</i> <sub>TEM-1B</sub> , <i>aadA5</i> , <i>sul1</i> , <i>dfrA17</i> , <i>mph(A)</i> , <i>erm(B)</i>   | OP038282 |
|     |           |            |      |              | p201908234-6  | 8,379  | NT      | E63 | <i>strA</i> , <i>strB</i> , <i>sul2</i> , <i>tet(A)</i>                                                     | OP038283 |
| X13 | 202102843 | S83L, D87G | S80I | <i>dfrA1</i> | p202102843-3  | 89,779 | II      | II  | <i>bla</i> <sub>CTX-M-15</sub> , <i>qnrS1</i>                                                               | OP038292 |
|     |           |            |      |              | p202102843-4  | 80,145 | FII     | FE  | <i>bla</i> <sub>TEM-1B</sub> , <i>aadA5</i> , <i>sul1</i> , <i>dfrA17</i> , <i>mph(A)</i> , <i>erm(B)</i>   | OP038293 |
|     |           |            |      |              | p202102843-8  | 8,401  | NT      | E63 | <i>strA</i> , <i>strB</i> , <i>sul2</i> , <i>tet(A)</i>                                                     | OP038294 |

<sup>#</sup>, The *dfrA1* gene is a class 2 integron gene cassette present in a chromosomally inserted Tn7 (downstream from the bacterial gene *glmS*); <sup>\*</sup>, non-circularized; <sup>£</sup>, NT, non typable, Col(pH) means Col(pHAD28).

**Supplementary Table 4.** List of the 69 XDR (or inferred to be XDR) *S. sonnei* isolates published by other groups

| Isolate        | Year | Country <sup>s</sup> | Genotype  | CTX-M allele | Accession number   | Reference |
|----------------|------|----------------------|-----------|--------------|--------------------|-----------|
| 03_0044        | 2014 | Vietnam              | 3.6.1.1.1 | CTX-M-55     | ERR3094145         | 5, 6      |
| 02_1181        | 2014 | Vietnam              | 3.6.1.1.1 | CTX-M-15     | SRR3474168         | 5, 6      |
| 01_0643        | 2015 | Vietnam              | 3.6.1.1.1 | CTX-M-55     | ERR3094113         | 5         |
| 01_0839        | 2015 | Vietnam              | 3.6.1.1.1 | CTX-M-55     | ERR3094114         | 5         |
| 03_0194        | 2015 | Vietnam              | 3.6.1.1.1 | CTX-M-14     | ERR3094152         | 5, 6      |
| 03_0268        | 2015 | Vietnam              | 3.6.1.1.1 | CTX-M-55     | ERR3094155         | 5         |
| 03_0514        | 2015 | Vietnam              | 3.6.1.1.1 | CTX-M-14     | ERR3094167         | 5         |
| 03_0780        | 2015 | Vietnam              | 3.6.1.1.1 | CTX-M-14     | ERR3094172         | 5         |
| 187596         | 2015 | United Kingdom       | 3.6.1.1.1 | CTX-M-14     | SRR3530603         | 6         |
| 01_0932        | 2016 | Vietnam              | 3.6.1.1.1 | CTX-M-55     | ERR3094115         | 5         |
| 01_0953        | 2016 | Vietnam              | 3.6.1.1.1 | CTX-M-55     | ERR3094117         | 5         |
| 01_0975        | 2016 | Vietnam              | 3.6.1.1.1 | CTX-M-55     | ERR3094118         | 5         |
| 01_1008        | 2016 | Vietnam              | 3.6.1.1.1 | CTX-M-55     | ERR3094120         | 5         |
| 01_1077        | 2016 | Vietnam              | 3.6.1.1.1 | CTX-M-55     | ERR3094122         | 5         |
| 02_2142        | 2016 | Vietnam              | 3.6.1.1.1 | CTX-M-55     | ERR3094143         | 5         |
| 249376         | 2016 | United Kingdom       | 3.6.1.1   | CTX-M-15     | SRR5017524         | 6         |
| 261400         | 2016 | United Kingdom       | 3.6.1.1.1 | CTX-M-55     | SRR7186960         | 6         |
| AUSMDU00005736 | 2016 | Australia            | 3.6.1.1.1 | CTX-M-55     | SRR7886021         | 6, 7, 8   |
| AUSMDU00010002 | 2016 | Australia            | 3.6.1.1.1 | CTX-M-55     | SRR7886023         | 6, 7, 8   |
| PNUSAE006498   | 2017 | USA                  | 3.6.1.1.1 | CTX-M-14     | SRR5434942         | 6         |
| PNUSAE006476   | 2017 | USA                  | 3.6.1.1   | CTX-M-15     | SRR5434950         | 6         |
| PNUSAE008493   | 2017 | USA                  | 3.6.1.1.1 | CTX-M-55     | SRR5875679         | 6         |
| 408647         | 2017 | United Kingdom       | 3.6.1.1   | CTX-M-15     | SRR7244238         | 6         |
| 381252         | 2017 | United Kingdom       | 3.6.1.1   | CTX-M-15     | SRR7358007         | 6         |
| AUSMDU00006624 | 2017 | Australia            | 3.6.1.1.1 | CTX-M-55     | SRR7886280         | 6, 7, 8   |
| AUSMDU00016501 | 2018 | Australia            | 3.6.1.1.2 | CTX-M-55     | SRR10506699        | 6, 7      |
| AUSMDU00016500 | 2018 | Australia            | 3.6.1.1.2 | CTX-M-55     | SRR10506700        | 6, 7      |
| AUSMDU00016499 | 2018 | Australia            | 3.6.1.1.2 | CTX-M-55     | SRR10506702        | 6, 7      |
| 506788         | 2018 | United Kingdom       | 3.6.1.1.2 | CTX-M-15     | SRR7221227         | 6         |
| 533443         | 2018 | United Kingdom       | 3.6.1.1.1 | CTX-M-55     | SRR7286389         | 6         |
| 493395         | 2018 | United Kingdom       | 3.6.1.1.2 | CTX-M-15     | SRR7291660         | 6         |
| 549526         | 2018 | United Kingdom       | 3.6.1.1   | CTX-M-15     | SRR7367460         | 6         |
| 579964         | 2018 | United Kingdom       | 3.6.1.1.2 | CTX-M-15     | SRR7826920         | 6         |
| AUSMDU00013452 | 2018 | Australia            | 3.6.1.1.2 | CTX-M-55     | SRR7885960         | 6, 7, 8   |
| AUSMDU00012898 | 2018 | Australia            | 3.6.1.1.2 | CTX-M-55     | SRR7886243         | 6, 7, 8   |
| 627378         | 2018 | United Kingdom       | 3.6.1.1.2 | CTX-M-55     | SRR8117834         | 6         |
| 658645         | 2018 | United Kingdom       | 3.6.1.1   | CTX-M-15     | SRR8380048         | 6         |
| 3123885        | 2019 | Switzerland          | 3.6.1.1.2 | CTX-M-134    | CP049163, CP049164 | 4         |
| 19-0820-1561   | 2019 | Switzerland          | 3.6.1.1   | CTX-M-15     | CP049173, CP049173 | 4         |
| IBESS186       | 2019 | Netherlands          | 3.6.1.1   | CTX-M-15     | ERR3330659         | 6         |
| IBESS245       | 2019 | Netherlands          | 3.6.1.1   | CTX-M-15     | ERR3330799         | 6         |
| 790576         | 2019 | United Kingdom       | 3.6.1.1   | CTX-M-15     | SRR10005842        | 6         |
| 795372         | 2019 | United Kingdom       | 3.6.1.1   | CTX-M-27     | SRR10037531        | 6         |
| 801162         | 2019 | United Kingdom       | 3.6.1.1   | CTX-M-27     | SRR10088450        | 6         |
| 819800         | 2019 | United Kingdom       | 3.6.1.1.2 | CTX-M-15     | SRR10271372        | 6         |
| 821179         | 2019 | United Kingdom       | 3.6.1.1   | CTX-M-15     | SRR10302327        | 6         |
| 824423         | 2019 | United Kingdom       | 3.6.1.1   | CTX-M-15     | SRR10314892        | 6         |
| AUSMDU00027242 | 2019 | Australia            | 3.6.1.1.2 | CTX-M-14     | SRR10506633        | 6, 7      |
| AUSMDU00025310 | 2019 | Australia            | 3.6.1.1.2 | CTX-M-14     | SRR10506731        | 6, 7, 9   |
| AUSMDU00027777 | 2019 | Australia            | 3.6.1.1.2 | CTX-M-14     | SRR10506734        | 6, 7, 9   |
| AUSMDU00028447 | 2019 | Australia            | 3.6.1.1.2 | CTX-M-14     | SRR10506844        | 6, 7, 9   |
| AUSMDU00028554 | 2019 | Australia            | 3.6.1.1   | CTX-M-15     | SRR10506849        | 6, 7, 9   |
| 845732         | 2019 | United Kingdom       | 3.6.1.1.2 | CTX-M-134    | SRR10559611        | 6         |
| 866406         | 2019 | United Kingdom       | 3.6.1.1   | CTX-M-15     | SRR10858744        | 6         |
| AUSMDU00038900 | 2019 | Australia            | 3.6.1.1   | CTX-M-15     | SRR12131989        | 9         |

|                |      |                |           |          |             |    |
|----------------|------|----------------|-----------|----------|-------------|----|
| AUSMDU00032220 | 2019 | Australia      | 3.6.3     | CTX-M-15 | SRR12131999 | 9  |
| AUSMDU00032223 | 2019 | Australia      | 3.6.3     | CTX-M-15 | SRR12132002 | 9  |
| 738605         | 2019 | United Kingdom | 3.6.1.1   | CTX-M-15 | SRR9050419  | 6  |
| AUSMDU00040532 | 2020 | Australia      | 3.6.1.1.2 | CTX-M-27 | SRR12132000 | 9  |
| AUSMDU00040564 | 2020 | Australia      | 3.6.1.1.2 | CTX-M-27 | SRR12132003 | 9  |
| 1324211        | 2022 | United Kingdom | 3.6.1.1.2 | CTX-M-27 | SRR15512411 | 10 |
| 1502196        | 2022 | United Kingdom | 3.6.1.1.2 | CTX-M-27 | SRR16612616 | 10 |
| 1519721        | 2022 | United Kingdom | 3.6.1.1.2 | CTX-M-27 | SRR16842843 | 10 |
| 1519755        | 2022 | United Kingdom | 3.6.1.1.2 | CTX-M-27 | SRR16842826 | 10 |
| 1527837        | 2022 | United Kingdom | 3.6.1.1.2 | CTX-M-27 | SRR16940973 | 10 |
| 1527854        | 2022 | United Kingdom | 3.6.1.1.2 | CTX-M-27 | SRR16940985 | 10 |
| 1534306        | 2022 | United Kingdom | 3.6.1.1.2 | CTX-M-27 | SRR17038739 | 10 |
| 1538007        | 2022 | United Kingdom | 3.6.1.1.2 | CTX-M-27 | SRR17099017 | 10 |
| 1538717        | 2022 | United Kingdom | 3.6.1.1.2 | CTX-M-27 | SRR17120129 | 10 |

<sup>§</sup> Travel to Southeast Asia for isolates AUSMDU00005736 and AUSMDU00010002; travel to Nepal for isolate 19-0820-1561 and travel to Israel for isolate 3123885.

## Supplementary References

1. Worley, J.N. et al. Genomic drivers of multidrug-Resistant *Shigella* affecting vulnerable patient populations in the United States and abroad. *mBio* **12**, e03188-20 (2021).
2. Locke, R.K., Greig, D.R., Jenkins, C., Dallman, T.J. & Cowley, L.A. Acquisition and loss of CTX-M plasmids in *Shigella* species associated with MSM transmission in the UK. *Microb. Genom.* **7**, 000644 (2021).
3. Baker, K.S. et al. Intercontinental dissemination of azithromycin-resistant shigellosis through sexual transmission: a cross-sectional study. *Lancet Infect. Dis.* **15**, 913–921 (2015).
4. Campos-Madueno, E.I. et al. Rapid increase of CTX-M-producing *Shigella sonnei* isolates in Switzerland due to spread of common plasmids and international clones. *Antimicrob. Agents Chemother.* **64**, e01057-20 (2020).
5. Thanh Duy, P. et al. Commensal *Escherichia coli* are a reservoir for the transfer of XDR plasmids into epidemic fluoroquinolone-resistant *Shigella sonnei*. *Nat. Microbiol.* **5**, 256-64 (2020).
6. Hawkey, J. et al. Global population structure and genotyping framework for genomic surveillance of the major dysentery pathogen, *Shigella sonnei*. *Nat. Commun.* **12**, 2684 (2021).
7. Williamson, D., Ingle, D. & Howden, B. Extensively Drug-Resistant Shigellosis in Australia among Men Who Have Sex with Men. *N. Engl. J. Med.* **381**, 2477–9 (2019).
8. Ingle, D.J. et al. Co-circulation of multidrug-resistant *Shigella* among men who have sex with men in Australia. *Clin. Infect. Dis.* **69**, 1535–1544 (2019).
9. Ingle, D.J. et al. Prolonged outbreak of multidrug-resistant *Shigella sonnei* harboring *bla*<sub>CTX-M-27</sub> in Victoria, Australia. *Antimicrob. Agents Chemother.* **64**, e01518-20 (2020).
10. Charles, H. et al. Outbreak of sexually transmitted, extensively drug-resistant *Shigella sonnei* in the UK, 2021-22: a descriptive epidemiological study. *Lancet Infect. Dis.* **22**, 1503-1510 (2022).
