# Supplementary material
Source: PubMed Central journal article supplement (PMC9884218)
Supplement: 41467_2023_36222_MOESM3_ESM.pdf [file 41467_2023_36222_MOESM3_ESM.pdf]

## **Description of Additional Supplementary Files**

File Name: Supplementary Data 1

Description: List of the 3,140 *S. sonnei* genomic sequences from isolates and historical strains of the FNRC-ESS included in the phylogenetic tree. The following are shown: isolate name, alternative isolate name, year of isolation, country of isolation, isolated in Mainland France or in Overseas France, notion of international travel, EBI-ENA accession numbers.
